**1 Murine ex vivo cultured alveolar macrophages provide a novel tool to**  
**2 study tissue-resident macrophage behavior and function**

3 A.-D. Gorki<sup>1,2</sup>, D. Symmank<sup>1,2</sup>, S. Zahalka<sup>1,2</sup>, K. Lakovits<sup>1,2</sup>, A. Hladik<sup>1,2</sup>, B.  
 4 Langer<sup>3</sup>, B. Maurer<sup>4</sup>, V. Sexl<sup>4</sup>, R. Kain<sup>3</sup> and S. Knapp<sup>1,2</sup>

5 <sup>1</sup>Research Laboratory of Infection Biology, Department of Medicine I, Medical  
 6 University of Vienna, Austria

7 <sup>2</sup>CeMM, Research Center for Molecular Medicine of the Austrian Academy of  
 8 Sciences, Austria

9 <sup>3</sup>Department of Pathology, Medical University of Vienna, Austria

10 <sup>4</sup>Institute of Pharmacology and Toxicology, University of Veterinary Medicine,  
 11 Vienna, Austria

12  
 13 *Abstract word count: 157*

14 *Text word count: 3964*

15 *Figures: 5 Main Figures + 5 Supplemental Figures*

16  
 17 *Corresponding Author:*

18 Sylvia Knapp, MD, PhD,

19 Research Laboratory of Infection Biology, Department of Medicine I, Medical  
 20 University of Vienna

21 Waehringer Guertel 18-20, 1090 Vienna, Austria

22 Phone: +43-1-40400-51390, Fax: +43-1-40400-51670

23 E-mail: [sylvia.knapp@meduniwien.ac.at](mailto:sylvia.knapp@meduniwien.ac.at)

## 24 KEYPOINTS

- 25 • A novel method to culture and expand primary alveolar macrophages  
26 over several months ex vivo
- 27 • Murine ex vivo cultured alveolar macrophages (mexAMs) restore lung  
28 function in a murine pulmonary alveolar proteinosis model

## 30 SUMMARY

31 Tissue-resident macrophages are of vital importance as they preserve tissue  
32 homeostasis in all mammalian organs. Nevertheless, appropriate cell culture  
33 models are still limited. Here, we propose a novel culture model to study and  
34 expand murine primary alveolar macrophages (AMs), the tissue-resident  
35 macrophages of the lung, in vitro over several months. By providing a  
36 combination of GM-CSF, TGF $\beta$  and the PPAR $\gamma$  activator rosiglitazone, we  
37 maintain and expand mouse ex vivo cultured AMs, short mexAMs, over  
38 several months. MexAMs maintain typical morphologic features and stably  
39 express primary AM surface markers throughout in vitro culture. They respond  
40 to microbial ligands and exhibit an AM-like transcriptional profile, including the  
41 expression of AM specific transcription factors. Furthermore, when transferred  
42 into AM deficient mice, mexAMs efficiently engraft in the lung and fulfill key  
43 macrophage functions leading to a significantly reduced surfactant load in  
44 those mice. Altogether, mexAMs provide a novel, simple and versatile tool to  
45 study AM behavior in homeostasis and disease settings.

## 47 INTRODUCTION

48 Tissue-resident macrophages (TRMs) are capable of self-renewal under  
49 homeostatic conditions in many organs including the lung<sup>1,2</sup>. By continuous  
50 sensing of the surrounding milieu, TRMs adapt to microenvironmental signals,  
51 resulting in distinct, tissue-specific macrophage identities<sup>3-5</sup>.  
52 Alveolar macrophages (AMs), the TRMs of the lung, reside in the alveoli, the  
53 air-liquid interface of the lung, where they perform organ-specific functions

54 such as the clearance of surfactant proteins and cell debris. AMs arise from  
 55 fetal liver-derived monocytes that differentiate via granulocyte-macrophage  
 56 colony-stimulating factor (GM-CSF)<sup>1</sup> and transforming growth factor (TGFβ)<sup>6</sup>  
 57 induced expression of the transcription factor peroxisome proliferator-  
 58 activated receptor gamma (PPARγ) around postnatal day 3<sup>7,8</sup>. The absence of  
 59 autocrine TGFβ signaling in AMs of young mice resulted in reduced AM  
 60 numbers, together with increased protein content in the bronchoalveolar  
 61 lavage<sup>6</sup>. The accumulation of surfactant and subsequent development of  
 62 pulmonary alveolar proteinosis (PAP) is also observed in mice and humans  
 63 that lack mature AMs due to a loss of GM-CSF receptor subunits<sup>9,10</sup>. In  
 64 patients, PAP is a rare lung disease associated increased susceptibility to  
 65 infections and pulmonary fibrosis, which requires regular bronchoscopic  
 66 removal of the protein-rich liquid<sup>11,12</sup>. To fully appreciate the functional  
 67 versatility and therapeutic potential of AMs, appropriate cell culture models  
 68 are required.

69 In vitro research on macrophages is essentially limited to the use of bone  
 70 marrow-derived macrophages that can be expanded and cultured in sufficient  
 71 numbers. In contrast, TRMs such as AMs must be isolated from mice and can  
 72 only be kept in culture for a few days. In this study, we established a protocol  
 73 for the ex vivo expansion and culture of primary AMs, which we termed  
 74 mexAMs, by providing AMs with culture conditions that mimic lung  
 75 microenvironmental factors. These cultured mexAMs expand rapidly and can  
 76 be maintained and stored for several months, while continuously exhibiting  
 77 characteristic features of primary AMs, including typical cell surface markers  
 78 such as CD11c and Siglec-F and an AM-like transcriptional profile. Adoptively  
 79 transferred mexAMs efficiently engraft in the lung and fulfill AM functions. This  
 80 includes the reduction of surfactant and protein accumulation upon transfer  
 81 into AM deficient mice. Taken together, mexAMs represent a valuable and  
 82 versatile tool to study primary AM functions in health and disease.

## 83    **METHODS**

84    **Mice.** C57BL/6J, CD45.1<sup>13</sup> and UBI-GFP<sup>14</sup> mice were originally obtained from  
 85    Jackson Laboratory. *CD169<sup>Cre/+</sup>STAT5ab<sup>fl/fl</sup>* mice (STAT5ΔCD169) or  
 86    *STAT5<sup>fl/fl</sup>* littermate controls were obtained by crossing CD169-Cre<sup>15</sup> provided  
 87    by the RIKEN BRC, Japan, and floxed STAT5ab<sup>16</sup> mice provided by R. Morigl  
 88    (University of Veterinary Medicine, Vienna). *Csf2rb<sup>-/-</sup>Csf2rb2<sup>-/-</sup>* mice<sup>10,17</sup> were  
 89    provided by M. Busslinger (Research Institute of Molecular Pathology,  
 90    Vienna). All mice were maintained on a C57BL/6 background and bred and  
 91    housed under specific pathogen-free conditions. Mice of both sexes, aged 7-  
 92    14 weeks were used. All animal experiments were approved by the Austrian  
 93    Federal Ministry of Sciences and Research (BMBWF-66.009/0340-  
 94    V/3b/2019).

96    **Culture of murine postnatal liver cells.** Livers were taken between  
 97    postnatal day 0.5 and 5 and squeezed through a sterile 70 μm cell strainer.  
 98    Red blood cells were lysed using ammonium chloride lysis buffer. Single cell  
 99    suspensions (0.2x10<sup>6</sup>/ml) were cultured in RPMI 1640 containing 10% FCS  
 100    and 1% pen/strep (“experiment medium”) supplemented with indicated  
 101    combinations of murine GM-CSF (30 ng/ml), human TGFβ (10 ng/ml) and  
 102    rosiglitazone (1 μM). After 6 days, adherent cells were detached and replated  
 103    at 4x10<sup>4</sup> cells/cm<sup>2</sup>. Subsequently, cells were passaged when 70-90%  
 104    confluency was reached.

106    **Maintenance of mouse ex-vivo cultured alveolar macrophages (mexAM).**  
 107    Bronchoalveolar lavage from single or a pool of three to four mice was used.  
 108    Cells were counted and 0.2x10<sup>6</sup> cells/ml were cultured in experiment medium  
 109    supplemented with murine GM-CSF (30 ng/ml), human TGFβ (10 ng/ml) and  
 110    rosiglitazone (1 μM). After 2 h non-adherent cells were washed off and fresh  
 111    medium was added. Cells were passaged every 5-6 days when 70-90%  
 112    confluency was reached.

113

114 **Isolation of murine bone marrow-derived macrophages and peritoneal**  
 115 **macrophages.** Femurs and tibias were flushed with PBS and mouse bone  
 116 marrow cells were differentiated for 5 days in experiment medium  
 117 supplemented with 10% L929 conditioned medium. Peritoneal lavage was  
 118 performed using sterile PBS and cells were plated in experiment medium for 3  
 119 h and then washed twice to remove non-adherent cells. Peritoneal  
 120 macrophages were immediately used for flow cytometry or RNA-seq  
 121 protocols.

122

123 **Flow cytometry.** Single cell suspensions were incubated with anti-mouse  
 124 CD16/CD32 monoclonal antibody for 10 min at 4°C. A mix of fluorescently  
 125 labeled monoclonal antibodies was added for 30 min at 4°C (Resource table).  
 126 Sample acquisition was performed on a LSR Fortessa equipped with  
 127 FACSDiva software (BD Biosciences). Singlets were gated using FSC-A  
 128 versus FSC-H, followed by a FSC-A/SSC-A gate. Dead cells and erythrocytes  
 129 were removed from analysis, using a fixable viability dye eFluor780 and anti-  
 130 mouse Ter119. Next, CD45.1 and CD45.2 positive cells were used for further  
 131 analysis. Alveolar macrophages were defined as SiglecF<sup>high</sup>CD11c<sup>+</sup> cells.

132

133 **Seahorse measurement.** Extracellular acidification rate (ECAR) and oxygen  
 134 consumption rate (OCR) were analysed using a XF-96 Extracellular Flux  
 135 Analyzer (Seahorse Bioscience) according to manufacturer's instructions.  
 136 Cells were plated in XF-96 cell culture plates (1x10<sup>5</sup> cells/well). To remove  
 137 non-adherent cells, cells were washed twice with Seahorse XF RPMI medium  
 138 supplemented with 10 mM Glucose, 1 mM Pyruvate, 2mM L-Glutamine and  
 139 3% FCS. For real-time analysis of ECAR and OCR, cells were pre-incubated  
 140 for 1 h under non-CO<sub>2</sub> conditions. To assess mitochondrial function, 1 μM  
 141 oligomycin, 1.5 μM fluoro-carbonyl cyanide phenylhydrazone (FCCP) and 100  
 142 nM rotenone plus 1 μM antimycin A (all Sigma-Aldrich) were injected where  
 143 indicated. Data analysis was performed on obtained OCR values after  
 144 subtraction of respective non-mitochondrial respiration values from all data

145 points. ATP production was represented as OCR difference to baseline after  
146 injection of oligomycin.

147

148 **Cytospin.** Cells were spun onto glass slides using the Shandon Cytospin 4  
149 and air-dried. Staining was performed using Giemsa solution.

150

151 **Tissue sampling and processing.** Mice were sacrificed by isoflurane  
152 inhalation (3.5% isoflurane, 2 l/min oxygen) followed by intraperitoneal  
153 injection of 450 mg/kg ketamine and 37.5 mg/kg Rompun in sterile saline. A  
154 bronchoalveolar lavage with 1 ml saline was performed. Afterwards, lungs  
155 were mechanically disrupted by GentleMACS dissociation (Miltenyi Biotec) in  
156 RPMI 1640 containing 5% FCS, 165 U/ml Collagenase I and 12 U/ml Dnase I,  
157 followed by digestion for 30 min at 37°C and a final homogenization step. Cell  
158 suspension was passed through a 70 µm cell strainer and red blood cells  
159 were lysed using ammonium chloride buffer.

160 **Phagocytosis assay.** Cells were plated for 3 h, followed by an incubation  
161 with FITC-labeled heat-inactivated *S. pneumoniae* (MOI 100) for 45 min at  
162 37°C or 4°C (negative control). Uptake of bacteria was assessed via FITC  
163 expression using flow cytometry. Phagocytosis index was calculated as (MFI  
164 × % positive cells at 37°C) minus (MFI × % positive cells at 4°C).

165

166 **Electron microscopy.** Cells were fixed in Karnovsky fixative (2% PFA, 2.5%  
167 GA in 0.1M cacodylate buffer), washed with cacodylate buffer and stored  
168 overnight at 4°C. Next, they were embedded in 1% agarose type IV and  
169 treated with 1% osmium tetroxide for 1 h and dehydrated through an ethanol  
170 series. After embedding in resin, ultrathin sections were placed on copper  
171 mesh grids and stained with 2% uranyl acetate and lead citrate. Samples  
172 were examined with a JEM-1400 Plus transmission electron microscope  
173 (JEOL).

174

175 **Cell stimulations.** Cell types were stimulated in 96-well plates (5x10<sup>5</sup>  
176 cells/ml) with heat-inactivated *S. pneumoniae* (MOI 100) or LPS E.coli O55:B5

177 (10 ng/ml). The levels of secreted cytokines were determined in supernatants  
178 after 16 h. For polarization experiments cells were seeded for 2.5 h and  
179 afterwards treated with LPS (100 ng/ml) and IFN $\gamma$  (200 U/ml), IL-4 (10 ng/ml)  
180 and IL-13 (10 ng/ml) or IL-10 (10 ng/ml) for 1.5 h (qPCR) or 16 h (nitrite  
181 measurement).

182

183 **Cytokine analysis.** Indicated mouse cytokines were measured using the  
184 LEGENDplex Mouse Macrophage/Microglia Panel (BioLegend). Samples  
185 were prepared according to manufacturer's instructions and analysed by flow  
186 cytometry. Data analysis was performed using the LEGENDplex data analysis  
187 software.

188

189 **Proliferation assay.** To assess cell proliferation, intracellular ATP levels were  
190 measured according to the CellTiter-Glo $\text{\textregistered}$  assay (Promega) instructions.  
191 Luminescence was expressed as fold change compared to time-point of  
192 seeding.

193

194 **Immunocytochemistry.** Lungs of untreated *Csf2rb*<sup>-/-</sup>*Csf2rb2*<sup>-/-</sup> mice or *Csf2rb*<sup>-/-</sup>  
195 *Csf2rb2*<sup>-/-</sup> that received GFP mexAMs intranasally 4 weeks earlier were fixed  
196 in 4% PFA for 48 h, dehydrated in 15% and 30% sucrose for 24 h each as  
197 described earlier<sup>18</sup>. Sections were stained with anti-pro + mature Surfactant  
198 Protein B antibody and DAPI.

199

200 **qPCR.** Total mRNA was isolated using the NucleoSpin kit (Macherey-Nagel)  
201 according to manufacturers' instructions. Real-time PCR was performed using  
202 the Perfecta SYBR Green Master Mix (Quant Bio). Following primers were  
203 used: *mMrc1* (TCTGGGCCATGAGGCTTCTC, CACGCAGCGCTTGTGATC  
204 TT), *mYm1* (TCTGGGTACAAGATCCCTGAACTG, GCTGCTCCATGGTCC  
205 TTCCA). Gene expression was normalized to *mHprt* and expressed as fold  
206 change to indicated control.

207

208 **Nitrite measurement.** Nitrite in cell culture supernatants was measured using  
209 the Griess Reagent System (Promega) according to manufacturers'  
210 instructions.

211

212 **Adoptive cell transfer.** Mice were anesthetized with isoflurane and  $0.4-1 \times 10^6$   
213 cells per mouse were intranasally administered. Mice were sacrificed at  
214 indicated time-points. The bronchoalveolar lavage was centrifuged at 300 g  
215 and the optical density at 600 nm was recorded using an Ultrospec 10  
216 (Amersham Biosciences). Cells were manually counted using a Neubauer  
217 chamber or a Z2 cell counter (Beckman Coulter).

218

219 **RNA-sequencing.** Total RNA from indicated cell types was isolated using  
220 RNeasy Micro kit (Qiagen). Libraries were prepared from 150 ng total RNA  
221 input using the QuantSeq 3' mRNA-Seq Library Prep Kit and UMI Second  
222 Strand Synthesis Module (Lexogen), according to the manufacturer's  
223 instructions. Pooled libraries were 65 bp single-end sequenced on the  
224 HiSeq4000 (Illumina). Sequencing was performed at the Biomedical  
225 Sequencing Facility (CeMM and Medical University of Vienna). Demultiplexing  
226 of raw data and mapping to the mouse genome GRCm38 (mm10) was done  
227 using the Bluebee® software (version Quantseq 2.3.6 FWD UMI).

228

229 **DEG and GO enrichment.** Differential expression analysis was performed  
230 using functions from the Bioconductor package DESeq2<sup>19</sup>. All macrophage  
231 populations derived from three independent biological replicates (mouse 1-3)  
232 or from two independent mexAM cultures taken at passage 8 and 13 (Pool 1)  
233 or passage 5 and 10 (Pool 2). DEGs were defined as absolute log2 fold  
234 change >2 and adjusted p-value <0.01 in comparisons between primary AMs  
235 and any other cell type (BMDM, PM, mexAM). Heatmaps were generated  
236 using the pheatmap function. The most significantly enriched GO terms were  
237 assessed using the enrichGO function of clusterprofiler<sup>20</sup>. The AM specific  
238 gene list was curated from two publications<sup>3,21</sup> and unpublished data.

239

240



## 241 **Statistical analysis**

242 Data are presented as mean  $\pm$  SEM. Comparisons were performed using  
 243 unpaired two-tailed Student's *t*-test for two groups or one-way ANOVA for  
 244 more than two groups. Statistical significance was defined as  $p < 0.05$ .  
 245 Number of animals is indicated as "n". Sizes of tested animal groups were  
 246 dictated by availability of the transgenic strains and litter sizes, allowing  
 247 littermate controls.

## 248 RESULTS

### 249 Murine alveolar macrophage-like cells can be derived from postnatal 250 liver cells

251 To identify the optimal culture conditions for the expansion of AMs, we  
252 considered a previously published protocol, where murine fetal liver cells were  
253 cultured in the presence of GM-CSF<sup>22</sup>. Aiming for a setting that more closely  
254 resembles the lung microenvironment, we cultured postnatal murine liver cells  
255 in the presence of indicated combinations of GM-CSF, TGFβ and  
256 rosiglitazone, an activator of the AM transcription factor PPARγ<sup>23</sup> (Fig. 1A).  
257 Already after six days, all cells treated with GM-CSF plus TGFβ or the triple  
258 combination had a round shape, closely resembling primary AMs (Fig. 1B,  
259 S1A). In contrast, two microscopically distinct cell populations, round and  
260 elongated, were observed when cells were grown in the presence of GM-CSF  
261 alone or GM-CSF plus rosiglitazone (Fig. 1B, S1A). In addition, we noticed  
262 that postnatal liver cells expanded very slowly in the presence of GM-CSF  
263 alone. This was reflected in significantly lower intracellular ATP levels in cells  
264 treated with GM-CSF alone (Fig. 1C, S1B).

265 Next, we assessed the expression of AM specific as well as pan-macrophage  
266 surface markers to define the differentiation profile by flow cytometry. AMs  
267 typically express high levels of Siglec-F and CD11c<sup>24</sup> (Fig. 1D, S1C). From  
268 day six onwards, CD11c<sup>+</sup> Siglec-F<sup>+</sup> cells emerged in the fetal liver cell cultures  
269 and the relative proportion of AM-like cells in culture gradually increased over  
270 time in all conditions (Fig. 1E, S1C). While CD11c was not expressed on  
271 freshly isolated postnatal liver cells, it increased over time, being highest on  
272 cells treated with GM-CSF only (Fig. 1F). Siglec-F expression was  
273 upregulated within 26 days in all conditions (Fig. 1G). Of note, cells treated  
274 with the combination of GM-CSF, TGFβ and rosiglitazone reached 100% of  
275 primary AM Siglec-F expression levels by differentiation day 77 (Fig. S1D,  
276 S1E). Mer tyrosine kinase (MerTK), a receptor involved in the engulfment of  
277 apoptotic cells, is highly expressed on various macrophage populations  
278 including AMs<sup>25</sup>. Already on differentiation day 6, MerTK expression was  
279 comparable to primary AM levels when cells were treated with GM-CSF plus

280 rosiglitazone or the triple combination (Fig. 1H). As AMs develop from Ly-  
281 6C<sup>+</sup>CD11b<sup>+</sup> fetal liver monocytes, we analyzed the expression of CD11b and  
282 Ly-6C over time, and observed a gradual downregulation of Ly-6C and  
283 consistently very low levels of CD11b (Fig. S1F, S1G).

284 These results show the ability of murine postnatal liver cells, cultured in the  
285 presence of GM-CSF, TGFβ and rosiglitazone, to progressively transition from  
286 a monocyte phenotype to an AM-like morphology and marker profile, while  
287 maintaining their proliferative capacity.

288

## 289 **Murine ex vivo cultured alveolar macrophages are functionally similar to** 290 **primary alveolar macrophages**

291 TRMs are terminally differentiated immune cell populations that retain self-  
292 renewing capacities<sup>2,26,27</sup>. Being able to generate AM-like cells from murine  
293 fetal liver cells, we continued to test our optimized protocol on mature, primary  
294 murine AMs (Fig. 2A). Primary AMs expanded and maintained their CD11c<sup>+</sup>  
295 Siglec-F<sup>+</sup> cell expression profile in culture over six months when treated with  
296 the combination of GM-CSF, TGFβ and rosiglitazone (Fig. 2B, S2A). These  
297 murine ex vivo cultured AMs (mexAMs) appeared strikingly similar to primary  
298 AMs, but distinct from BMDMs (Fig. 2C, S2B).

299 As innate immune cells, macrophages play a key role in the defense against  
300 pathogens by initiating a pro-inflammatory response. To test their functional  
301 properties, we exposed mexAMs, AMs and BMDMs to heat-inactivated *S.*  
302 *pneumoniae* (HI *S. pneu*, Fig. 2D, Table S1) and lipopolysaccharide (LPS,  
303 Fig. 2E, Table S1). With a few exceptions, mexAMs responded like primary  
304 AMs and showed a less vigorous release of cytokines and chemokines than  
305 BMDMs (Fig. 2D, 2E). We also tested if a freeze-thaw cycle affects the  
306 responsiveness of mexAMs and discovered that IL-6 (Fig. S2C) and CXCL1  
307 (Fig. S2D) levels did not differ between HI *S. pneu* stimulated thawed and  
308 continuously cultured mexAMs.

309 A main function of AMs in situ pertains to the phagocytosis of surfactant  
310 proteins and cellular debris in the alveoli. To test the phagocytic activity of  
311 mexAMs compared to primary AMs, we incubated them with FITC-labeled HI  
312 *S. pneu*, and observed an efficient and comparable uptake of bacteria by both

cell types (Fig. 2F). Another key characteristic of macrophages is the plasticity in their response to stimuli they are exposed to, while constantly surveying the surrounding tissue<sup>28</sup>. To assess this, we polarized mexAMs with classically activating M1 (IFN- $\gamma$  and LPS), alternatively activating M2 (IL-4 and IL-13), as well as deactivating (IL-10) stimuli. MexAMs maintained their plasticity, illustrated by the nitrite release upon M1-polarization (Fig. 2G) and induction of mannose receptor, C type I (*Mrc1*, Fig. 2H) and chitinase-like 3 (*Ym1*, Fig. 2I) upon M2-polarization. To investigate if mexAMs can be maintained without the combination of GM-CSF, TGF $\beta$  and rosiglitazone, we removed all trophic factors from the medium, which resulted in cell death of mexAMs within one week (Fig. S2E).

Collectively, these data demonstrate that mexAMs, in contrast to BMDMs, exhibit phenotypic and functional properties of primary AMs.

326

### **MexAMs are phenotypically and transcriptionally closest to primary murine alveolar macrophages**

Having established that mexAMs are functionally similar to primary AMs, we next compared their surface marker and transcriptional profile to different macrophage populations. These included BMDMs, as the macrophage type predominantly used for in vitro studies, arising from myeloid bone marrow progenitor cells, as well as peritoneal macrophages (PMs), a mature TRM population exposed to a different tissue microenvironment. Cell surface expression levels of the pan-macrophage marker F4/80 were comparable between all macrophage types, with slightly higher levels in mexAMs and PMs (Fig. 3A). In contrast, the AM surface markers Siglec-F (Fig. 3B) and CD11c (Fig. 3C) were exclusively expressed on mexAMs and AMs, but not BMDMs and PMs.

By examining differences in the transcriptional profile of these four macrophage types, principal component analysis conclusively revealed that mexAMs and AMs clustered tightly together, whereas BMDMs and PMs showed distinct transcriptional profiles (Fig. 3D). Consistently, hierarchical clustering of 2273 differentially expressed genes (DEG) revealed that mexAM samples clustered next to AMs, whereas BMDM samples were closest to PMs

(Fig. 3E). We identified nine different gene clusters (Fig. 3E, Table S2) with cluster IV and V consisting of genes upregulated in BMDMs and PMs. Cluster VIII comprised PM-specific genes such as *Klf2* and *Naip1*. The BMDM specific cluster I contained genes previously shown to be highly expressed in BMDMs such as *Trem2*<sup>29</sup>. Most interesting were two prominent clusters of genes, cluster II and VI, because they were upregulated in AMs and mexAMs but downregulated in BMDMs and PMs. When we compiled a list of 133 AM specific transcription factors and genes<sup>3,21</sup> (Table S3), we found 97 to be included in the DEG list shown in Fig. 3E. Most of these genes including *Ear2*, *Marco*, *Fabp1* as well as the transcription factor *Klf4* were part of the two clusters (II and VI) shared between mexAMs and AMs (Fig. 3F). Similarly, the transcription factor *Car4*, which is uniquely expressed in AMs<sup>4</sup>, was elevated in all mexAM and AM samples (cluster II). *Itgax*, the gene underlying CD11c, was highly upregulated in AMs but less expressed on a transcriptional level in mexAMs, whereas *Siglec f* was highly expressed in mexAM and AM samples, coinciding with the flow cytometry results shown before (Fig. 3B, 3C). In the mexAM specific cluster (cluster III), many metabolic genes such as *Acly*, *Pdk1* or *Fasn* were upregulated (Fig. S3A). This was also reflected in the enriched GO terms, which included different metabolic processes (Fig. S3B). Seahorse experiments confirmed highly elevated basal OCR, ATP production and basal ECAR levels in actively expanding mexAMs when compared to primary AMs and terminally differentiated BMDMs (Fig. S3C-G). These data led us to conclude that mexAMs and primary AMs share a common transcriptional signature that differs from BMDMs and PMs.

### **MexAMs engraft efficiently in a partially depleted alveolar macrophage niche in vivo**

To test whether mexAMs engraft in the physiological AM niche in vivo, we transferred CD45.1<sup>+</sup> mexAMs by intranasal administration into CD45.2 expressing STAT5ΔCD169 mice or littermate controls (Fig. 4A). STAT5 is required for the development of lung dendritic cells (DC) and AMs<sup>30</sup>. The loss of STAT5 in CD169 expressing cells, which include AMs but not monocytes or DCs<sup>31</sup>, led to a partially emptied AM niche, indicated by a significantly reduced

number of AMs in the bronchoalveolar lavage fluid (BALF) (Fig. S4A). Four weeks after transfer, a pronounced CD45.1<sup>+</sup> mexAM population was found in the BALF of STAT5ΔCD169 and control mice (Fig. 4B, upper and lower right panel). In STAT5ΔCD169 mice we observed up to 50% of CD11c<sup>+</sup>Siglec-F<sup>+</sup> cells to be of CD45.1<sup>+</sup> mexAM origin, while in littermate controls about 9% of BALF (Fig. 4C) or lung (Fig. S4B) CD11c<sup>+</sup>Siglec-F<sup>+</sup> cells expressed CD45.1. When expressed in absolute numbers, mexAM transfer sufficiently restored the AM niche in STAT5ΔCD169 animals after four weeks (Fig. 4D). To test if transferred mexAMs are capable to long-term repopulate the alveolar niche<sup>2</sup>, we transferred CD45.1<sup>+</sup> mexAMs into the partially empty AM niche of STAT5ΔCD169 mice and analyzed the BALF eight weeks later. We found a prominent CD45.1<sup>+</sup> mexAM population, comprising up to 73% of the total AM population in STAT5ΔCD169 mice. This indicates that transferred mexAMs self-renew and repopulate the AM niche long-lasting (Fig. 4E, S4C). Finally, we tested if mexAMs possess the ability to settle in and repopulate the lungs of newborn mice. Thus, we transferred CD45.1<sup>+</sup> mexAMs into two weeks old STAT5ΔCD169 animals. Consistent with the results in adult STAT5ΔCD169 mice, we found a significant increase in BALF cell numbers 14 weeks after mexAM transfer into young mice (Fig. 4F). These findings demonstrate that mexAMs can efficiently engraft and replenish the AM niche in vivo.

# **MexAMs restore lung function in a murine pulmonary alveolar proteinosis model**

To understand if mexAMs can home to the AM niche as efficiently as primary AMs, we transferred CD45.1<sup>+</sup> mexAMs and GFP<sup>+</sup> AMs in a 1:1 ratio into the partially depleted AM niche of STAT5ΔCD169 mice (Fig. 5A). Using flow cytometry we could clearly distinguish these two populations after the transfer (Fig. 5B) and on average 27% of BALF cells consisted of transferred cells after four weeks (Fig. S5A). Analysis of the transferred CD11c and Siglec-F expressing population revealed that the ratio between CD45.1<sup>+</sup> mexAMs and GFP<sup>+</sup> primary AMs remained unchanged and that mexAMs and primary AMs contributed equally to the AM population (Fig. 5C). Twelve weeks after

transfer, BALF cells in STAT5 $\Delta$ CD169 mice mainly comprised of transferred cells (Fig. S5C), consistent with data shown in Fig. 4E. However, at this time GFP<sup>+</sup> primary AMs outnumbered CD45.1<sup>+</sup> mexAMs (Fig. S5B). To compare the proliferation and homing potential of two in vitro cultured macrophage types, we repeated the experimental set-up described in Fig. 5A and transferred GFP<sup>+</sup> BMDMs and CD45.1<sup>+</sup> mexAMs in a 1:1 ratio (Fig. S5D). Already after four weeks, BMDMs made up a higher proportion of the transferred cells in the immune cell population of the BALF (Fig. S5E-F).

One of the essential housekeeping functions of AMs is the clearance of lipids and proteins from the alveolar space<sup>32</sup>. Impaired GM-CSF signaling leads to the absence of mature and functional AMs, increased accumulation of surfactant proteins and subsequent development of pulmonary alveolar proteinosis (PAP)<sup>12</sup>. To assess if mexAMs are capable of lipid and protein clearance, we transferred CD45.1<sup>+</sup> mexAMs into lungs of GM-CSF receptor knock out mice (*Csf2rb*<sup>-/-</sup>*Csf2rb2*<sup>-/-</sup>, GM-CSFR KO). Four weeks thereafter, we detected a CD11c<sup>+</sup> Siglec-F<sup>+</sup> AM population in the lavage (Fig. 5D). Development of PAP and surfactant accumulation was significantly reduced upon mexAM transfer, as illustrated by a significantly reduced BALF turbidity (Fig. 5E), and a decreased surfactant protein B content in the lungs of GM-CSFR KO mice (Fig. 5F).

These data show that mexAMs engraft the alveolar niche and take over AM functions in vivo, thereby preventing PAP development in GM-CSFR KO mice. Collectively, these data support the usefulness of mexAMs to study AM behavior in homeostatic and disease settings.



## 436 DISCUSSION

437 The tissue environment shapes the identity of macrophage subsets<sup>3-5</sup>, making  
438 it almost mandatory to use specific, tissue derived macrophages for in vitro  
439 studies. Furthermore, most TRM populations are of embryonic origin<sup>2</sup> and are  
440 thereby quite different in their development compared to the widely used,  
441 adult hematopoietic stem cell derived BMDMs.

442 By mimicking the lung microenvironment using GM-CSF, TGF $\beta$  and the  
443 PPAR $\gamma$  activator rosiglitazone we first used fetal liver cells to generate AM-like  
444 cells. Supplementing the medium with GM-CSF induced expression of the  
445 integrin molecule CD11c in accordance with established protocols that use  
446 GM-CSF to generate CD11c expressing DCs from hematopoietic  
447 progenitors<sup>33,34</sup>. The addition of TGF $\beta$  to the culture medium induced constant  
448 expansion of fetal liver derived AM-like cells, confirming the importance of  
449 TGF $\beta$  in the early AM differentiation<sup>6</sup>. Notably, only the use of the combination  
450 of GM-CSF, TGF $\beta$  and rosiglitazone induced high Siglec-F expression levels,  
451 a hallmark of primary AMs. We propose to use these fetal liver-derived AM-  
452 like cells as a tool to study AM development in vitro.

453 In a next step we cultured mature, fully differentiated primary AMs ex vivo.  
454 MexAMs expand rapidly while keeping their phenotypic and functional AM-like  
455 profile over several months in culture. In line with published results<sup>1,8</sup> we  
456 found that expansion of mexAMs is dependent on GM-CSF and cannot be  
457 accomplished by supplementing medium with TGF $\beta$  or rosiglitazone alone  
458 (data not shown). While limited GM-CSF concentrations regulate the  
459 population of the AM niche in vivo<sup>23</sup>, excessive GM-CSF concentrations used  
460 under culture conditions allow constant mexAM proliferation and expansion.

461 A main advantage of any in vitro culture system is the unrestricted number of  
462 cells that can be utilized for high-throughput assays like whole genome  
463 CRISPR screens. We used a common transfection reagent and could confirm  
464 that mexAMs can be efficiently transfected with established protocols (data  
465 not shown), supporting their usability for high-throughput screening  
466 experiments.

467 Analysis of the transcriptional profile of mexAMs revealed that these cells  
468 clustered most closely with AM samples and maintained an AM specific gene



expression profile including the transcription factors Klf4<sup>35</sup> and Car4<sup>4</sup>. The fact that these mexAM samples derived from single biological replicates or pooled lavages as well as from different passaging numbers, confirms the reproducibility and stability of the AM transcriptomic profile over time. Yet, it is important to note that mexAMs, as an actively proliferating population, exhibited features of expanding cells in their metabolic profile. We therefore recommend additional optimization strategies, when using mexAMs for metabolic assays.

In the next step, we demonstrated that transferred mexAMs replenished the partially depleted AM niche of STAT5 $\Delta$ CD169 mice and could be detected up to 14 weeks later in the lavage. Remarkably, even when transferred to WT mice mexAMs settled in the filled niche, albeit to a much lower extent than in STAT5 $\Delta$ CD169 mice, supporting the idea that macrophage niches are self-regulating systems that contain a stable macrophage number<sup>23</sup>. When performing competitive transfers with 1:1 ratio of mexAMs and AMs, we detected equal numbers of both populations after four weeks. Surprisingly though, when we repeated the competitive transfer assay, mixing mexAMs and BMDMs, we saw a higher proliferative capacity of BMDMs as compared to mexAMs. The high proliferative capacity of transferred BMDMs is in line with data showing that adult bone marrow monocytes display a competitive advantage when re-filling an emptied AM niche, as compared to the remaining donor derived AM population<sup>1,2,36</sup>.

We envision a wide range of potential applications for mexAMs including co-culture models with immune and structural cells, to better understand disease settings associated with macrophages including lung fibrosis<sup>36</sup> or cancer<sup>37</sup>. Here, we provide evidence that mexAMs can substitute for primary AMs as they restored impaired alveolar surfactant cleaning and prevented the development of PAP in mice lacking primary AMs in vivo.

In summary, our study highlights a previously underappreciated ability to culture and expand fully differentiated TRMs ex vivo over several months by maintaining their intrinsic, tissue-resident macrophage profile.

## 500 **ACKNOWLEDGMENTS**

501 We thank the flow cytometry core facility and the animal facility of the Medical  
 502 University of Vienna for their support. CD169cre mice were kindly provided by  
 503 Miriam Merad (Icahn School of Medicine at Mount Sinai, New York, USA).  
 504 S.K. is supported by the Austrian Science Fund (FWF) within the Special  
 505 Research Programs Chromatin Landscapes (L-Mac: F 6104) and  
 506 Immunothrombosis (F 5410), as well as the Doctoral Program Cell  
 507 Communication in Health and Disease (W1205). V.S. and B.M. are supported  
 508 by the FWF Special Research Program (F 6107).

509

## 510 **AUTHOR CONTRIBUTIONS**

511 A.-D.G., D.S., S.Z., K.L. and A.H. performed experiments and analyzed data;  
 512 A.-D.G. analyzed bioinformatic data; B.L. and R.K. performed electron  
 513 microscopy experiments; B.M. and V.S. provided valuable reagents and  
 514 technical advice. A.-D.G. and S.K. wrote the manuscript with input from co-  
 515 authors and conceptualized the study.

# FIGURE LEGENDS

## Fig 1. Murine alveolar macrophage-like cells can be derived from postnatal liver cells.

(A) Experimental set-up. (B) Primary AMs after 3h in culture and postnatal liver cells treated with murine GM-CSF (30ng/ml) or murine GM-CSF (30ng/ml) + human TGF $\beta$  (10ng/ml) + rosiglitazone (1 $\mu$ M) (Triple) after 6 days (D6) and 26 days (D26) in culture; 40x magnification. (C) Cell proliferation of postnatal liver cells under indicated conditions over 5 days compared to time of seeding. (D) FACS analysis of Siglec-F and CD11c expression on primary AMs and postnatal liver cells grown under indicated conditions on D26. (E) Percentage of CD11c<sup>+</sup>Siglec-F<sup>+</sup> cells in postnatal liver cell cultures at day of seeding, D6 and D26. (F) CD11c, (G) Siglec-F and (H) MerTK mean fluorescence intensity levels of postnatal liver cell cultures as fold change to primary AMs at indicated days. (D-H) Pre-gated on single, viable CD45<sup>+</sup> cells. Graphs show means  $\pm$  SEM of 3-4 biological replicates. Data are representative of at least two independent experiments. \*p < 0.05, \*\*p<0.01 (Student's t test). AM= alveolar macrophages, D= day, PN= postnatal, Rosi= Rosiglitazone.

## Fig 2. Murine ex vivo cultured alveolar macrophages (mexAMs) are functionally similar to primary alveolar macrophages.

(A) Experimental set-up. (B) FACS analysis of Siglec-F and CD11c expression on primary AMs and mexAMs on day 13. Pre-gated on viable CD45<sup>+</sup> cells. (C) Electron microscopy pictures of primary AMs, mexAMs or BMDMs. Magnification: 3000x, scale bar: 3 $\mu$ m. (D and E) Measurement of indicated cytokines upon heat-inactivated *S. pneumoniae* (MOI 100) (D) or LPS (10ng/ml) (E) stimulation of AMs, mexAMs or BMDMs for 16 h, expressed as fraction of maximal secretion. (F) Phagocytosis index of primary AMs and mexAMs. (G) Nitrite concentration in supernatants of polarized mexAMs after 16 h. (H and I) M2 polarization markers m*Mrc1* (H) and m*Ym1* (I) assessed by RT-PCR in polarized mexAMs after 1.5 h. Graphs show means  $\pm$  SEM of 3-4 biological replicates (D, E) or technical quadruplicates (F-I). Data are representative of at least two independent experiments. \*p <

0.05, \*\*p<0.01, \*\*\*p<0.001, \*\*\*\*p<0.0001 (one-way ANOVA followed by Dunnett's multiple comparison test). AM= alveolar macrophages, BAL= bronchoalveolar lavage, BMDM= bone marrow-derived macrophages, D= day, HI= heat-inactivated, mexAM= mouse ex vivo cultured alveolar macrophages.

554

**Fig 3. MexAMs are phenotypically and transcriptionally closest to primary murine alveolar macrophages.**

(A) F4/80, (B) Siglec-F and (C) CD11c cell surface expression on mexAMs, primary AMs, primary PMs and BMDMs measured by FACS. Pre-gated on viable CD45<sup>+</sup> cells. (D) PCA analysis of indicated cell types of three biological replicates (mouse 1-3) plus mexAM samples derived from different passages of mexAM cultures (Pool). (E) Heatmap of genes differentially expressed (absolute log<sub>2</sub>fc value >2, p-adj <0.01) between primary AMs and any other cell type (PM, BMDM, mexAM). n indicates total number of genes per cluster. Raw counts were rlog transformed, followed by z-score scaling. (F) Heatmap of AM specific genes found in indicated clusters. AM= alveolar macrophages, BMDM= bone marrow-derived macrophages, mexAM= mouse ex vivo cultured alveolar macrophages, PC= principal component, PM= peritoneal macrophages.

569

**Fig 4. MexAMs engraft efficiently in a partially depleted alveolar macrophage niche in vivo.**

(A) Experimental set-up. Intranasal transfer of CD45.1<sup>+</sup> mexAMs into CD45.2 expressing control (STAT5fl/fl) or STAT5ΔCD169 mice. (B) FACS analysis of CD45.1 and CD11b expression of control (upper panel) and STAT5ΔCD169 (lower panel) BALF cells untreated, or 4 weeks after transfer of CD45.1<sup>+</sup> mexAMs. Pregated on viable Siglec-F<sup>+</sup>/CD11c<sup>+</sup> cells. (C) Percentage of resident (CD45.2<sup>+</sup>, grey) and transferred (CD45.1<sup>+</sup>, orange) cells in BALF of control (STAT5fl/fl, n=4) and STAT5ΔCD169 mice (n=4) 4 weeks post CD45.1<sup>+</sup> mexAM transfer. (D) CD11c<sup>+</sup>Siglec-F<sup>+</sup> lung cell number in STAT5fl/fl and STAT5ΔCD169 mice untreated and 4 weeks post transfer of CD45.1<sup>+</sup> mexAMs. (E) Percentage of resident (CD45.2<sup>+</sup>, grey) and transferred

(CD45.1<sup>+</sup>, orange) cells in BALF of STAT5ΔCD169 mice (n=4-5) 8 weeks post CD45.1<sup>+</sup> mexAM transfer. (F) BALF cell count per ml in STAT5fl/fl and STAT5ΔCD169 mice 14 weeks post transfer of CD45.1<sup>+</sup> mexAMs into young (14 d) old mice. Graphs show means ± SEM of 2-5 biological replicates. \*p < 0.05, \*\*p<0.01, \*\*\*p<0.001 (one-way ANOVA followed by Sidak's multiple comparison test). BALF= bronchoalveolar lavage, i.n.= intranasal, mexAM= mouse ex vivo cultured alveolar macrophages, ns= non significant.

# **Fig 5. MexAMs restore lung function in a murine pulmonary alveolar proteinosis model.**

(A) Experimental set-up. Intranasal transfer of CD45.1<sup>+</sup> mexAMs and GFP<sup>+</sup> AMs in a 1:1 ratio into CD45.2 expressing STAT5ΔCD169 mice. (B) FACS analysis of GFP and CD45.1 expression in BALF of STAT5ΔCD169 mice 4 weeks after transfer of 50% GFP<sup>+</sup> AMs and 50% CD45.1<sup>+</sup> mexAMs. Pre-gated on viable Siglec-F<sup>+</sup>/CD11c<sup>+</sup> cells. (C) Percentage of AMs (GFP<sup>+</sup>, green) and mexAMs (CD45.1<sup>+</sup>, orange) Siglec-F<sup>+</sup>/CD11c<sup>+</sup> cells in BALF of STAT5ΔCD169 (n=4) mice 4 weeks post transfer. (D) FACS analysis of Siglec-F and CD11c expression on cells in BALF of GM-CSF receptor knock-out mice with and without transferred CD45.1<sup>+</sup> mexAMs. (E) Representative picture and quantification of BALF turbidity of GM-CSF receptor knock-out mice control and after transfer of CD45.1<sup>+</sup> mexAMs (4 weeks). (F) Immunofluorescent picture of surfactant protein B accumulation (SFB, red) in GM-CSF receptor knock-out mice without (left) and 4 weeks after transfer of GFP<sup>+</sup> mexAMs (green). Magnification: 20x, scalebar: 50 μm. Graphs show means ± SEM of 4-5 biological replicates or representative pictures. \*p < 0.05 (Student's t test). BALF= bronchoalveolar lavage, mexAM= mouse ex vivo cultured alveolar macrophages.

## **Supplemental figure legends**

### **Fig. S1**

(A) Primary AMs after 3 h in culture and postnatal liver cells treated with murine GM-CSF (30ng/ml)+ human TGFβ (10ng/ml) or GM-CSF (30ng/ml)+ Rosiglitazone (1μM) after 6 d (D6) and 26 d (D26) in culture; 40x

614 magnification. **(B)** Cell proliferation of postnatal liver cells under indicated  
 615 conditions over 5 days compared to time of seeding. **(C)** FACS analysis of  
 616 Siglec-F and CD11c expression in primary AMs and postnatal liver cells  
 617 grown under indicated conditions on D26. **(D)** FACS analysis of Siglec-F and  
 618 CD11c expression in primary AMs and postnatal liver cells grown with murine  
 619 GM-CSF+ human TGF $\beta$ + Rosiglitazone (Triple) on D77. **(E)** Siglec-F  
 620 expression in primary AMs and postnatal liver cells grown with murine GM-  
 621 CSF+ human TGF $\beta$ + Rosiglitazone (triple) on D77. **(F)** CD11b and **(G)** Ly-6C  
 622 mean fluorescence intensity levels of postnatal liver cell cultures as fold  
 623 change to primary alveolar macrophages at indicated days. **(C-G)** Pre-gated  
 624 on single, viable CD45<sup>+</sup> cells. Graphs show means  $\pm$  SEM of 3-4 biological  
 625 replicates. Data are representative of at least two independent experiments.  
 626 AM= alveolar macrophages, D= day, PN= postnatal, Rosi= Rosiglitazone.

627

## 628 **Fig. S2**

629 **(A)** FACS analysis of Siglec-F and CD11c expression in primary AMs and  
 630 mexAMs after 170 days in culture. Pre-gated on viable CD45<sup>+</sup> cells. **(B)**  
 631 Cytospin pictures of Giemsa-stained primary AMs or mexAMs cultured for 102  
 632 days. Magnification: 40x, scale bar: 15 $\mu$ m. **(C and D)** IL-6 **(C)** and CXCL-1 **(D)**  
 633 levels in supernatants of continuously cultured and thawed mexAMs  
 634 stimulated with heat-inactivated *S. pneumoniae* (MOI 100) for 16 h. **(E)** Cell  
 635 number of mexAMs cultured in murine GM-CSF+ human TGF $\beta$ +Rosiglitazone  
 636 (Triple) containing medium or in medium without trophic factors over time.  
 637 Graphs show means  $\pm$  SEM of technical quadruplicates. Data are  
 638 representative of at least two independent experiments. AM= alveolar  
 639 macrophages, D= day, h= hours, mexAM= mouse ex vivo cultured alveolar  
 640 macrophages, nd= non detectable, MOI= multiplicity of infection.

641

## 642 **Fig. S3**

643 **(A)** Heatmap of genes found in cluster III (Fig. 3E). Raw counts were rlog  
 644 transformed, followed by z-score scaling. **(B)** GO pathway enrichment of  
 645 cluster III. **(C-G)** Oxygen consumption rate (OCR, **C**) and extracellular

acidification rate (ECAR, **F**) of mexAMs, primary AMs or BMDMs (d5) were measured by Seahorse extracellular flux analysis at baseline and after injection of oligomycin (O), FCCP (F) and rotenone/antimycin A (R&A). Basal OCR (**D**), ATP production (**E**) and basal ECAR (**G**) of indicated cell types. (**C-G**) data are representative of two independent experiments. \* $p < 0.05$ , \*\* $p < 0.01$ , \*\*\* $p < 0.001$  (one-way ANOVA followed by Dunnett's multiple comparison test). AM= alveolar macrophages, BMDM= bone marrow-derived macrophages, ECAR= extracellular acidification rate, GO= gene ontology, mexAM= mouse ex vivo cultured alveolar macrophages, ns= non significant, OCR= oxygen consumption rate, PM= peritoneal macrophages.

#### Fig. S4

(**A**) BALF cell count per ml in STAT5fl/fl (control) and STAT5 $\Delta$ CD169 mice. (**B**) Percentage of resident (CD45.2<sup>+</sup>, grey) and transferred (CD45.1<sup>+</sup>, orange) cells in lungs of control (STAT5fl/fl, n=4) and STAT5 $\Delta$ CD169 mice (n=4) 4 weeks post CD45.1<sup>+</sup> mexAM transfer. (**C**) BALF cell count per ml in STAT5fl/fl and STAT5 $\Delta$ CD169 mice 8 weeks post transfer of CD45.1<sup>+</sup> mexAMs. Graphs show means  $\pm$  SEM of 4-5 biological replicates. \* $p < 0.05$ , \*\* $p < 0.01$  (Student's t test (A) or one-way ANOVA followed by Sidak's multiple comparison test (C)). BALF= bronchoalveolar lavage, mexAM= mouse ex vivo cultured alveolar macrophages.

#### Fig. S5

(**A**) Percentage of resident (CD45.2<sup>+</sup>, grey) and transferred (CD45.1<sup>+</sup> mexAMs and GFP<sup>+</sup> AMs, red) cells in BALF of STAT5 $\Delta$ CD169 mice (n=4) 4 weeks post transfer. (**B**) Percentage of AMs (GFP<sup>+</sup>, green) and mexAMs (CD45.1<sup>+</sup>, orange) Siglec-F<sup>+</sup>CD11c<sup>+</sup> cells in BALF of STAT5 $\Delta$ CD169 (n=3) mice 12 weeks post transfer. (**C**) Percentage of resident (CD45.2<sup>+</sup>, grey) and transferred (CD45.1<sup>+</sup> mexAMs and GFP<sup>+</sup> AMs, red) cells in BALF of STAT5 $\Delta$ CD169 mice (n=3) 12 weeks post transfer. (**D**) FACS analysis of GFP<sup>+</sup> BMDM and CD45.1<sup>+</sup> mexAM ratio on day of transfer. (**E**) BMDM (GFP<sup>+</sup>, green) and mexAM (CD45.1<sup>+</sup>, orange) percentage of Siglec-F<sup>+</sup>/CD11c<sup>+</sup> cells in BALF of STAT5 $\Delta$ CD169 (n=4) mice 4 weeks post transfer. (**F**) Percentage

678 of resident (CD45.2<sup>+</sup>, grey) and transferred (CD45.1<sup>+</sup> mexAMs and GFP<sup>+</sup>  
679 BMDMs, red) cells in BALF of STAT5ΔCD169 mice (n=4) 4 weeks post  
680 transfer. Graphs show means ± SEM of 3-4 biological replicates. AM=  
681 alveolar macrophages, BALF= bronchoalveolar lavage, BMDM= bone  
682 marrow-derived macrophages, i.n.= intranasal, mexAM= mouse ex vivo  
683 cultured alveolar macrophages.

684

## 685 **Supplemental Tables**

686 Resource table

687 Table S1 (Legendplex data for AM, mexAM and BMDM samples, related to  
688 Figure 2)

689 Table S2 (DEGs rlog transformed including cluster annotation and gene  
690 symbol, related to Figure 3)

691 Table S3 (List of AM specific genes, related to Figure 3)

692



## 693 REFERENCES

- 694 1. Guillems M, De Kleer I, Henri S, et al. Alveolar macrophages develop  
695 from fetal monocytes that differentiate into long-lived cells in the first week  
696 of life via GM-CSF. *J. Exp. Med.* 2013;210(10):1977–1992.
- 697 2. Hashimoto D, Chow A, Noizat C, et al. Tissue resident macrophages self-  
698 maintain locally throughout adult life with minimal contribution from  
699 circulating monocytes. *Immunity.* 2013;38(4):.
- 700 3. Gautier EL, Shay T, Miller J, et al. Gene-expression profiles and  
701 transcriptional regulatory pathways that underlie the identity and diversity  
702 of mouse tissue macrophages. *Nat. Immunol.* 2012;13(11):1118–1128.
- 703 4. Lavin Y, Winter D, Blecher-Gonen R, et al. Tissue-resident macrophage  
704 enhancer landscapes are shaped by the local microenvironment. *Cell.*  
705 2014;159(6):1312–1326.
- 706 5. Okabe Y, Medzhitov R. Tissue-specific signals control reversible program  
707 of localization and functional polarization of macrophages. *Cell.*  
708 2014;157(4):832–844.
- 709 6. Yu X, Buttgerit A, Lelios I, et al. The Cytokine TGF- $\beta$  Promotes the  
710 Development and Homeostasis of Alveolar Macrophages. *Immunity.*  
711 2017;47(5):903-912.e4.
- 712 7. Saluzzo S, Gorki A-D, Rana BMJ, et al. First-Breath-Induced Type 2  
713 Pathways Shape the Lung Immune Environment. *Cell Rep.*  
714 2017;18(8):1893–1905.
- 715 8. Schneider C, Nobs SP, Kurrer M, et al. Induction of the nuclear receptor  
716 PPAR- $\gamma$  by the cytokine GM-CSF is critical for the differentiation of fetal  
717 monocytes into alveolar macrophages. *Nat. Immunol.* 2014;15(11):1026–  
718 1037.
- 719 9. Dranoff G, Crawford AD, Sadelain M, et al. Involvement of granulocyte-  
720 macrophage colony-stimulating factor in pulmonary homeostasis. *Science.*  
721 1994;264(5159):713–716.
- 722 10. Robb L, Drinkwater CC, Metcalf D, et al. Hematopoietic and lung  
723 abnormalities in mice with a null mutation of the common beta subunit of  
724 the receptors for granulocyte-macrophage colony-stimulating factor and  
725 interleukins 3 and 5. *Proc. Natl. Acad. Sci. U.S.A.* 1995;92(21):9565–  
726 9569.
- 727 11. Suzuki T, Maranda B, Sakagami T, et al. Hereditary pulmonary alveolar  
728 proteinosis caused by recessive CSF2RB mutations. *Eur. Respir. J.*  
729 2011;37(1):201–204.
- 730 12. Trapnell BC, Nakata K, Bonella F, et al. Pulmonary alveolar proteinosis.  
731 *Nat Rev Dis Primers.* 2019;5(1):16.
- 732 13. Janowska-Wieczorek A, Majka M, Kijowski J, et al. Platelet-derived  
733 microparticles bind to hematopoietic stem/progenitor cells and enhance  
734 their engraftment. *Blood.* 2001;98(10):3143–3149.
- 735 14. Schaefer BC, Schaefer ML, Kappler JW, Marrack P, Kedl RM.  
736 Observation of antigen-dependent CD8<sup>+</sup> T-cell/ dendritic cell interactions  
737 in vivo. *Cell. Immunol.* 2001;214(2):110–122.
- 738 15. Karasawa K, Asano K, Moriyama S, et al. Vascular-resident CD169-  
739 positive monocytes and macrophages control neutrophil accumulation in  
740 the kidney with ischemia-reperfusion injury. *J. Am. Soc. Nephrol.*  
741 2015;26(4):896–906.

- 742 16. Cui Y, Riedlinger G, Miyoshi K, et al. Inactivation of Stat5 in Mouse  
743 Mammary Epithelium during Pregnancy Reveals Distinct Functions in Cell  
744 Proliferation, Survival, and Differentiation. *MCB*. 2004;24(18):8037–8047.
- 745 17. Nicola NA, Robb L, Metcalf D, et al. Functional inactivation in mice of the  
746 gene for the interleukin-3 (IL-3)-specific receptor beta-chain: implications  
747 for IL-3 function and the mechanism of receptor transmodulation in  
748 hematopoietic cells. *Blood*. 1996;87(7):2665–2674.
- 749 18. Takata K, Kozaki T, Lee CZW, et al. Induced-Pluripotent-Stem-Cell-  
750 Derived Primitive Macrophages Provide a Platform for Modeling Tissue-  
751 Resident Macrophage Differentiation and Function. *Immunity*.  
752 2017;47(1):183-198.e6.
- 753 19. Love MI, Huber W, Anders S. Moderated estimation of fold change and  
754 dispersion for RNA-seq data with DESeq2. *Genome Biol*.  
755 2014;15(12):550.
- 756 20. Yu G, Wang L-G, Han Y, He Q-Y. clusterProfiler: an R package for  
757 comparing biological themes among gene clusters. *OMICS*.  
758 2012;16(5):284–287.
- 759 21. Gibbings SL, Goyal R, Desch AN, et al. Transcriptome analysis highlights  
760 the conserved difference between embryonic and postnatal-derived  
761 alveolar macrophages. *Blood*. 2015;126(11):1357–1366.
- 762 22. Fejer G, Wegner MD, Györy I, et al. Nontransformed, GM-CSF-dependent  
763 macrophage lines are a unique model to study tissue macrophage  
764 functions. *Proc. Natl. Acad. Sci. U.S.A.* 2013;110(24):E2191-2198.
- 765 23. Guillems M, Thierry GR, Bonnardel J, Bajenoff M. Establishment and  
766 Maintenance of the Macrophage Niche. *Immunity*. 2020;52(3):434–451.
- 767 24. Zaynagetdinov R, Sherrill TP, Kendall PL, et al. Identification of myeloid  
768 cell subsets in murine lungs using flow cytometry. *Am. J. Respir. Cell Mol.*  
769 *Biol*. 2013;49(2):180–189.
- 770 25. Lee Y-J, Han J-Y, Byun J, et al. Inhibiting Mer receptor tyrosine kinase  
771 suppresses STAT1, SOCS1/3, and NF-κB activation and enhances  
772 inflammatory responses in lipopolysaccharide-induced acute lung injury. *J.*  
773 *Leukoc. Biol*. 2012;91(6):921–932.
- 774 26. Gomez Perdiguero E, Klapproth K, Schulz C, et al. Tissue-resident  
775 macrophages originate from yolk-sac-derived erythro-myeloid progenitors.  
776 *Nature*. 2015;518(7540):547–551.
- 777 27. Hoeffel G, Chen J, Lavin Y, et al. C-Myb+ Erythro-Myeloid Progenitor-  
778 Derived Fetal Monocytes Give Rise to Adult Tissue-Resident  
779 Macrophages. *Immunity*. 2015;42(4):665–678.
- 780 28. Murray PJ, Allen JE, Biswas SK, et al. Macrophage activation and  
781 polarization: nomenclature and experimental guidelines. *Immunity*.  
782 2014;41(1):14–20.
- 783 29. Turnbull IR, Gilfillan S, Cella M, et al. Cutting edge: TREM-2 attenuates  
784 macrophage activation. *J. Immunol*. 2006;177(6):3520–3524.
- 785 30. Eddy WE, Gong K-Q, Bell B, et al. Stat5 is required for CD103+ Dendritic  
786 Cell and Alveolar Macrophage Development and Protection from Lung  
787 Injury. *J Immunol*. 2017;198(12):4813–4822.
- 788 31. Chow A, Lucas D, Hidalgo A, et al. Bone marrow CD169+ macrophages  
789 promote the retention of hematopoietic stem and progenitor cells in the  
790 mesenchymal stem cell niche. *J. Exp. Med*. 2011;208(2):261–271.

- 791 32. Lambrecht BN. Alveolar Macrophage in the Driver's Seat. *Immunity*.  
792 2006;24(4):366–368.
- 793 33. Helft J, Böttcher J, Chakravarty P, et al. GM-CSF Mouse Bone Marrow  
794 Cultures Comprise a Heterogeneous Population of CD11c(+)MHCII(+) Macrophages and Dendritic Cells. *Immunity*. 2015;42(6):1197–1211.
- 795 34. Inaba K, Inaba M, Romani N, et al. Generation of large numbers of  
796 dendritic cells from mouse bone marrow cultures supplemented with  
797 granulocyte/macrophage colony-stimulating factor. *J. Exp. Med.*  
798 1992;176(6):1693–1702.
- 799 35. Roberts AW, Lee BL, Deguine J, et al. Tissue-Resident Macrophages Are  
800 Locally Programmed for Silent Clearance of Apoptotic Cells. *Immunity*.  
801 2017;47(5):913-927.e6.
- 802 36. Misharin AV, Morales-Nebreda L, Reyfman PA, et al. Monocyte-derived  
803 alveolar macrophages drive lung fibrosis and persist in the lung over the  
804 life span. *Journal of Experimental Medicine*. 2017;214(8):2387–2404.
- 805 37. Mukaida N, Nosaka T, Nakamoto Y, Baba T. Lung Macrophages:  
806 Multifunctional Regulator Cells for Metastatic Cells. *Int J Mol Sci*.  
807 2018;20(1):.  
808  
809

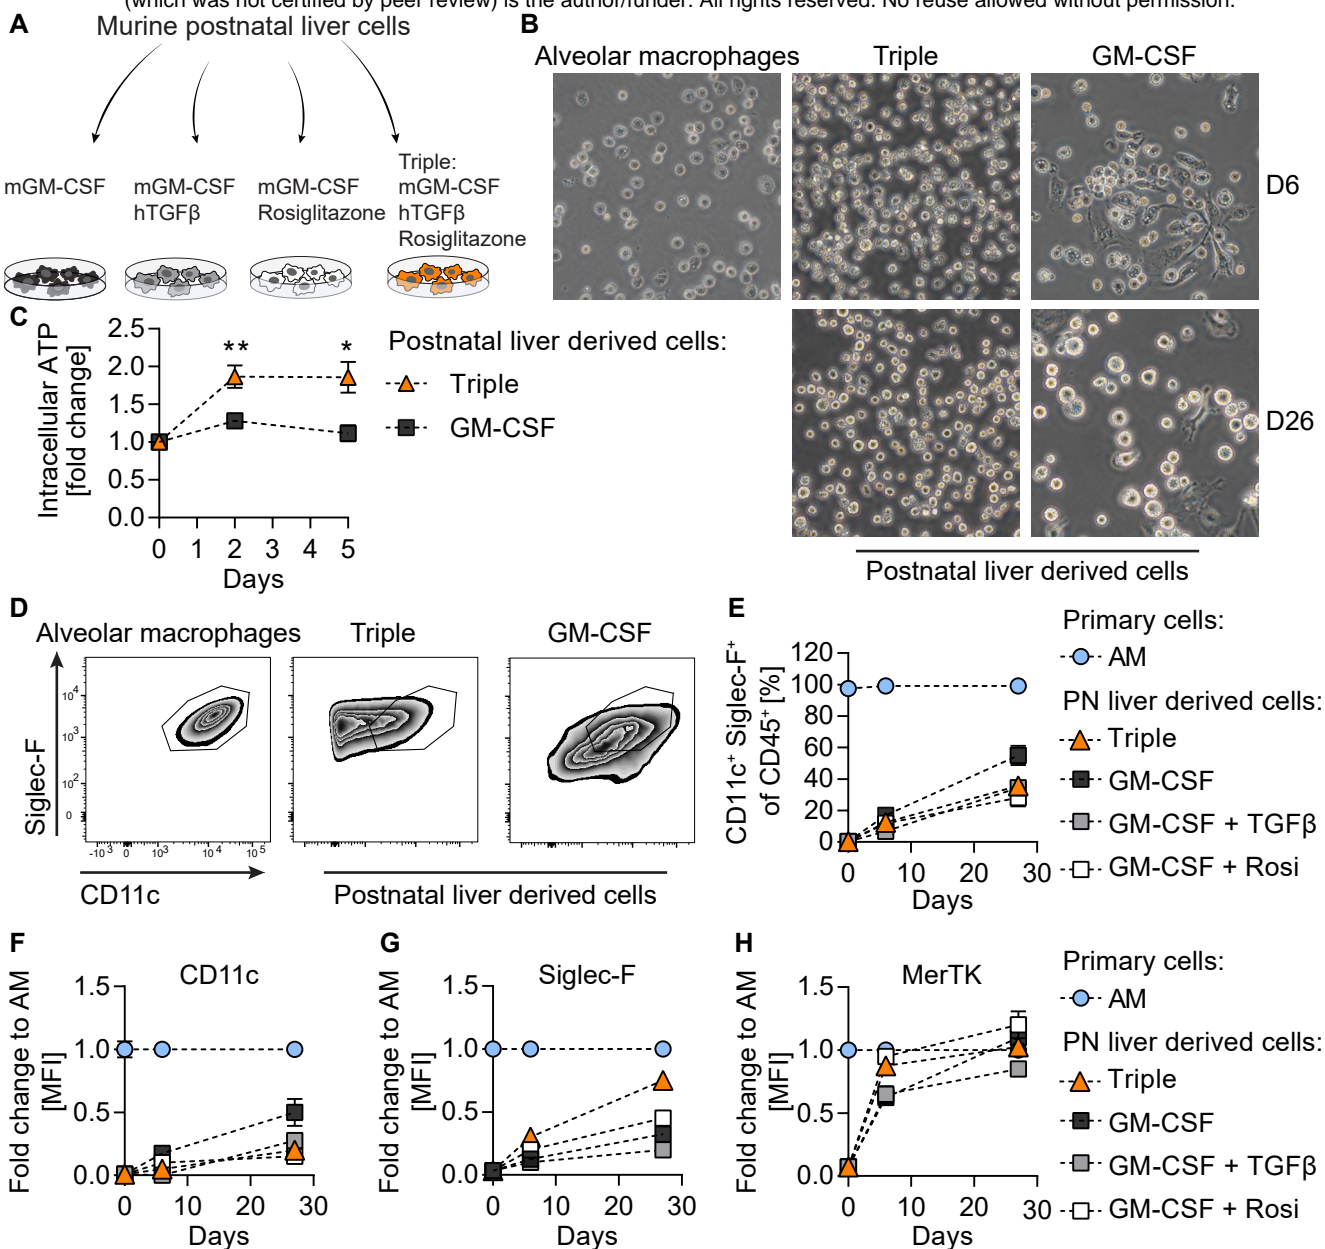

Figure 2

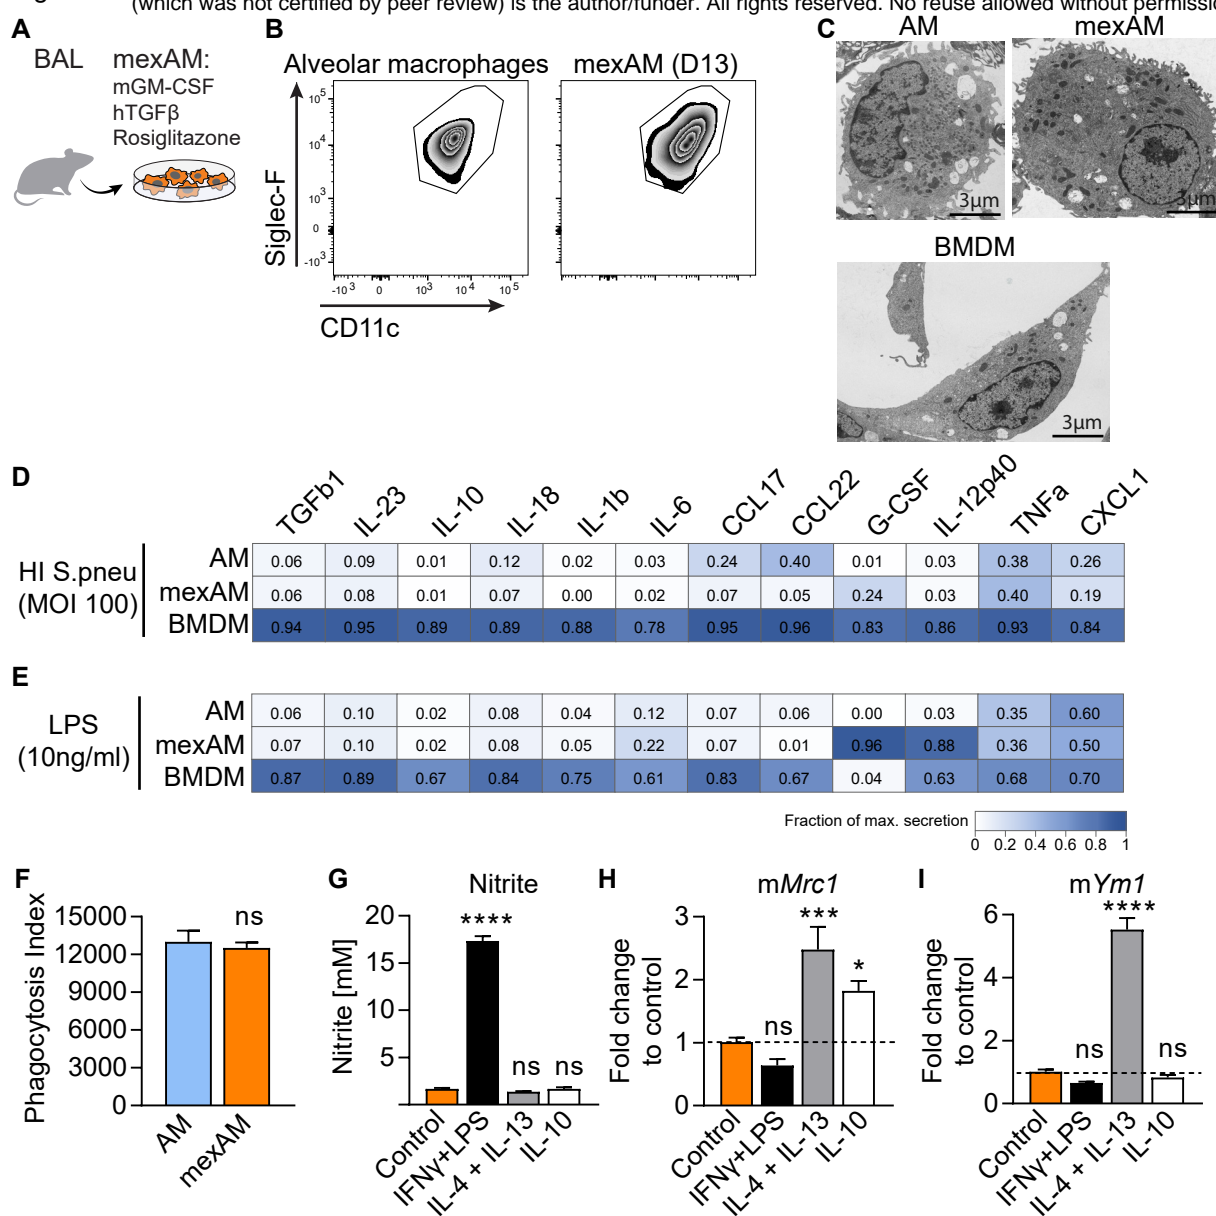

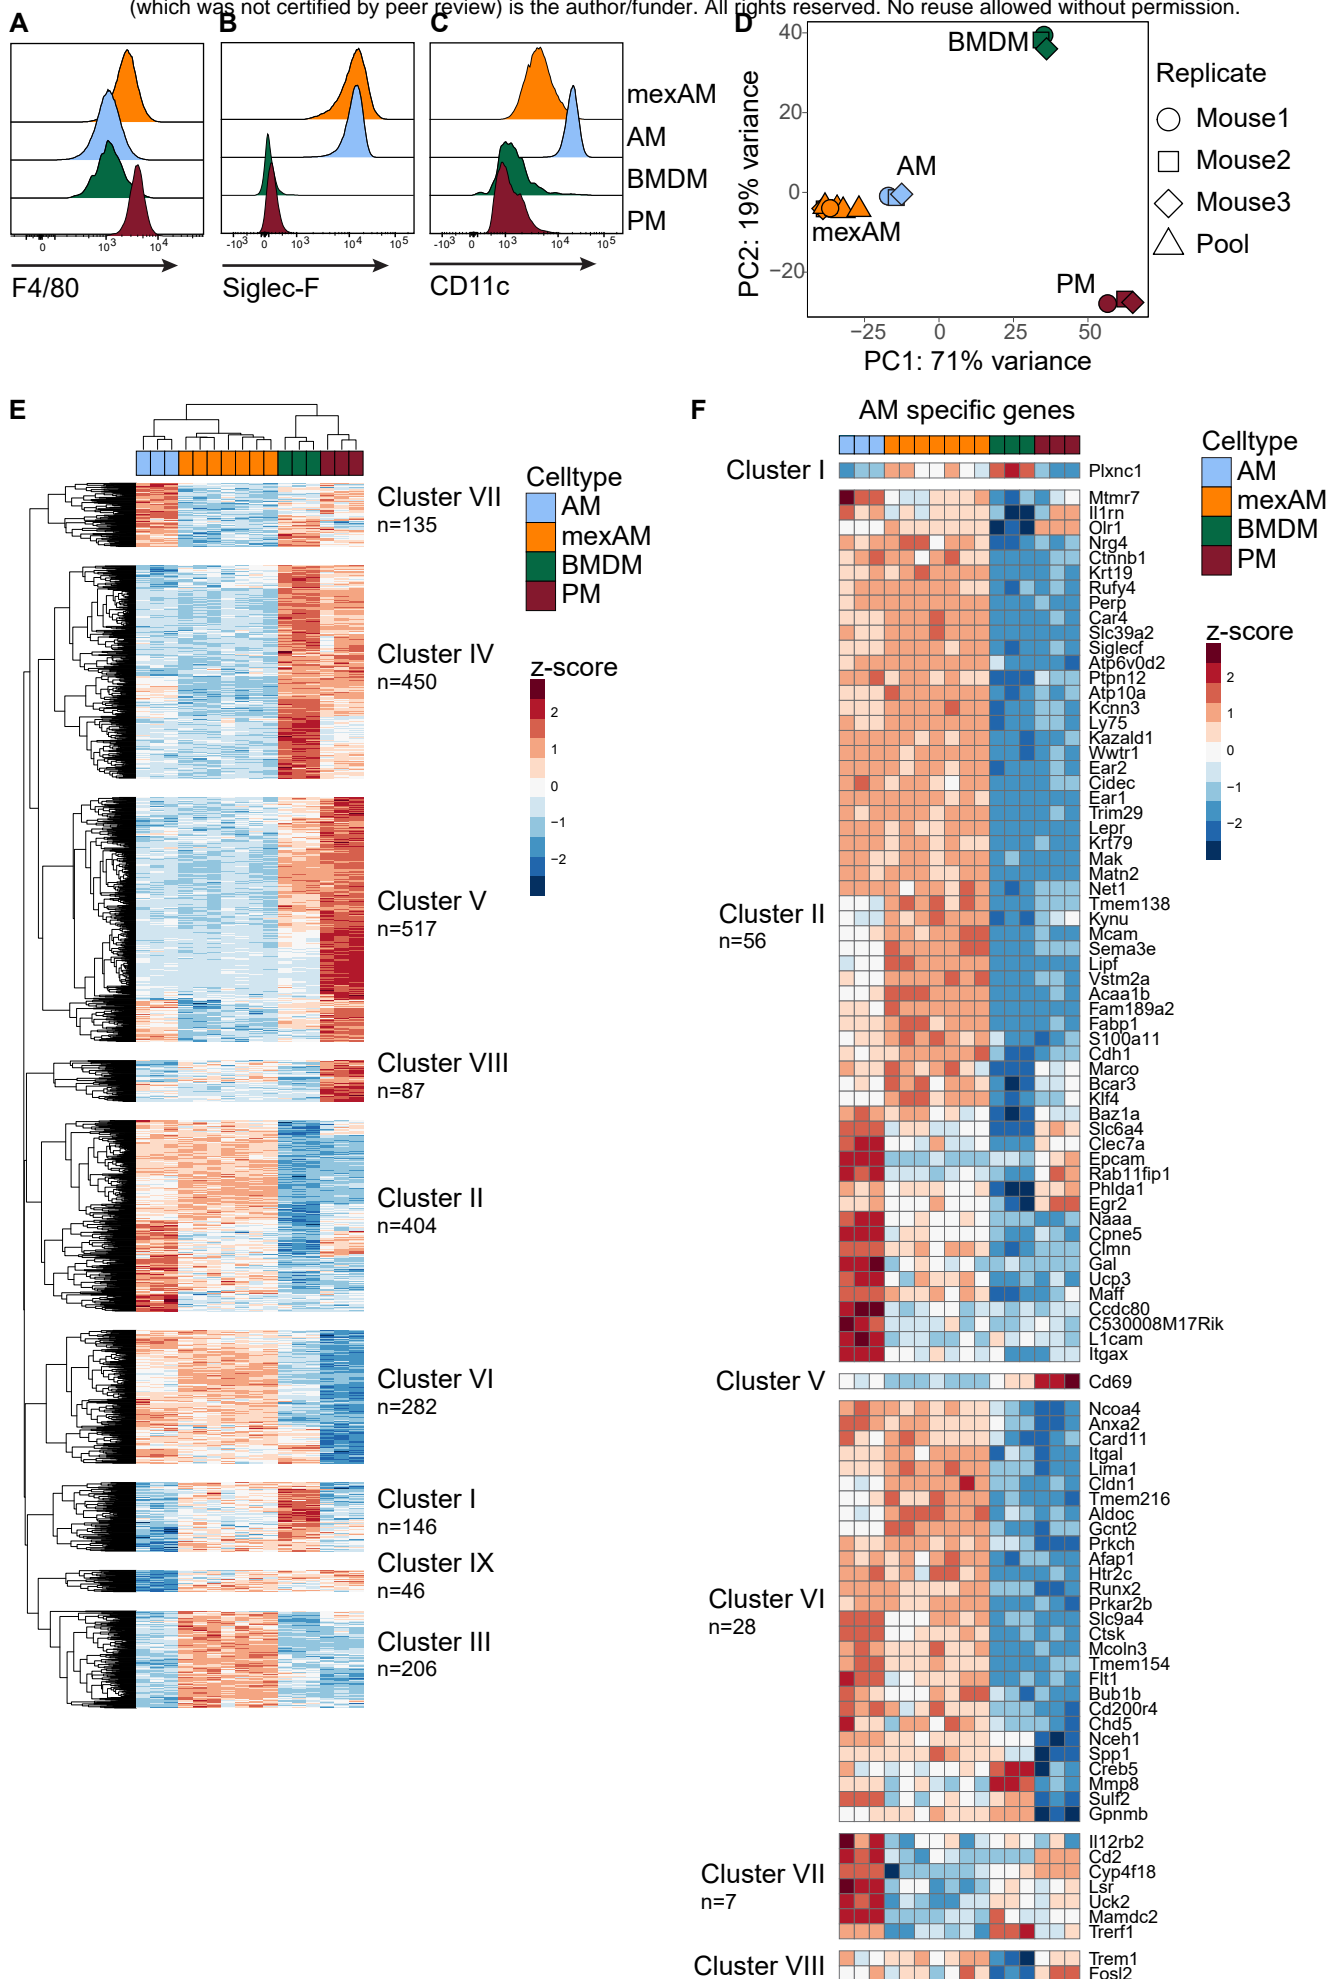



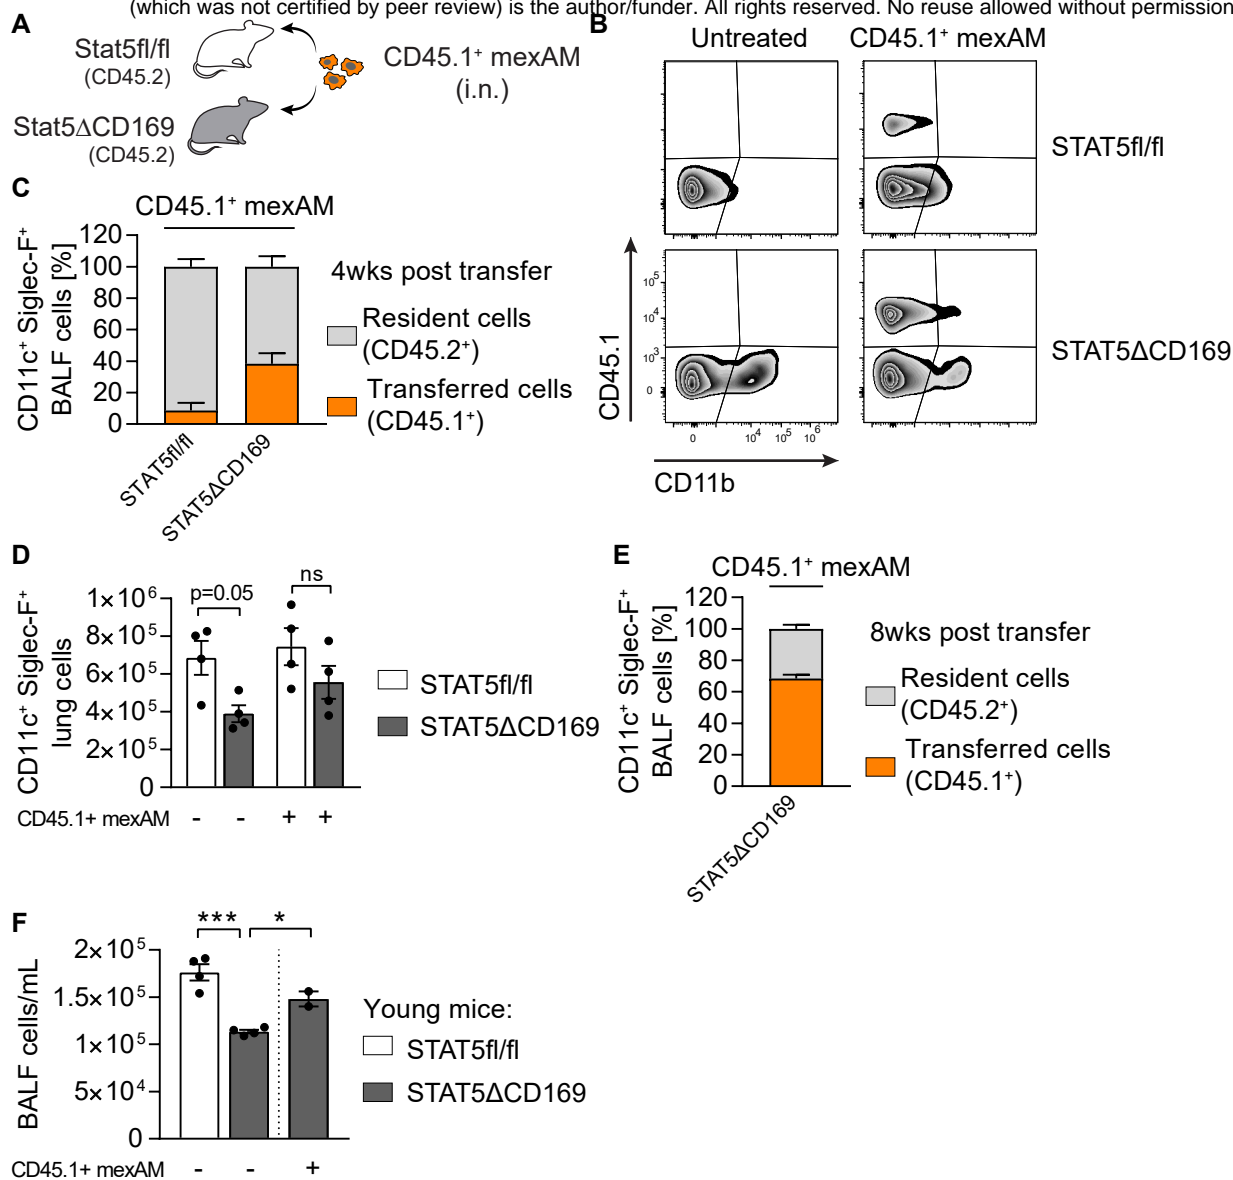

Figure 5

bioRxiv preprint doi: <https://doi.org/10.1101/2021.02.11.430791>; this version posted February 11, 2021. The copyright holder for this preprint (which was not certified by peer review) is the author/funder. All rights reserved. No reuse allowed without permission.

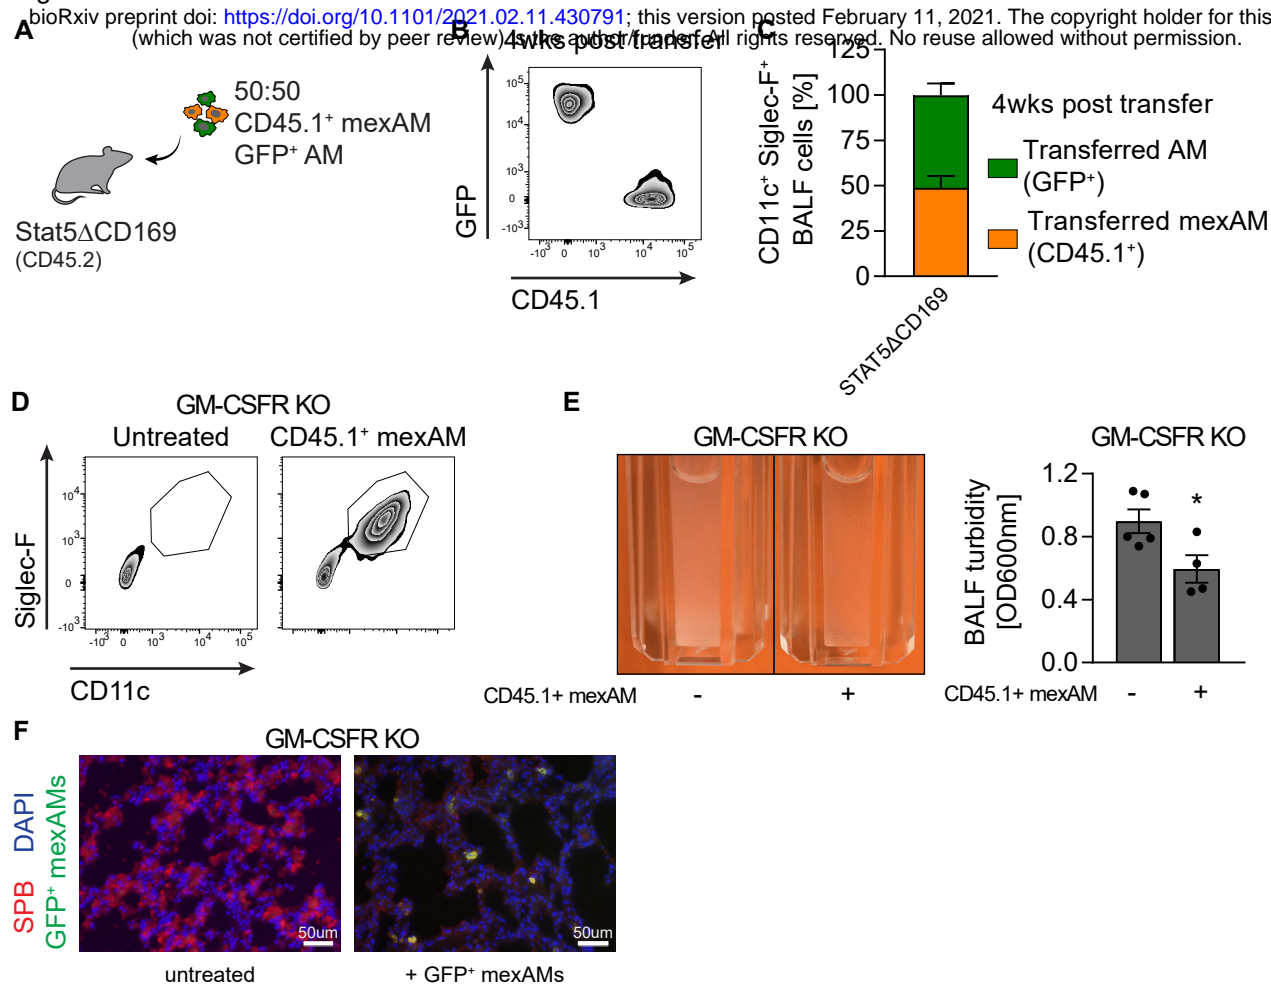



Figure S1

bioRxiv preprint doi: <https://doi.org/10.1101/2021.02.11.430791>; this version posted February 11, 2021. The copyright holder for this preprint (which was not certified by peer review) is the author/funder. All rights reserved. No reuse allowed without permission.

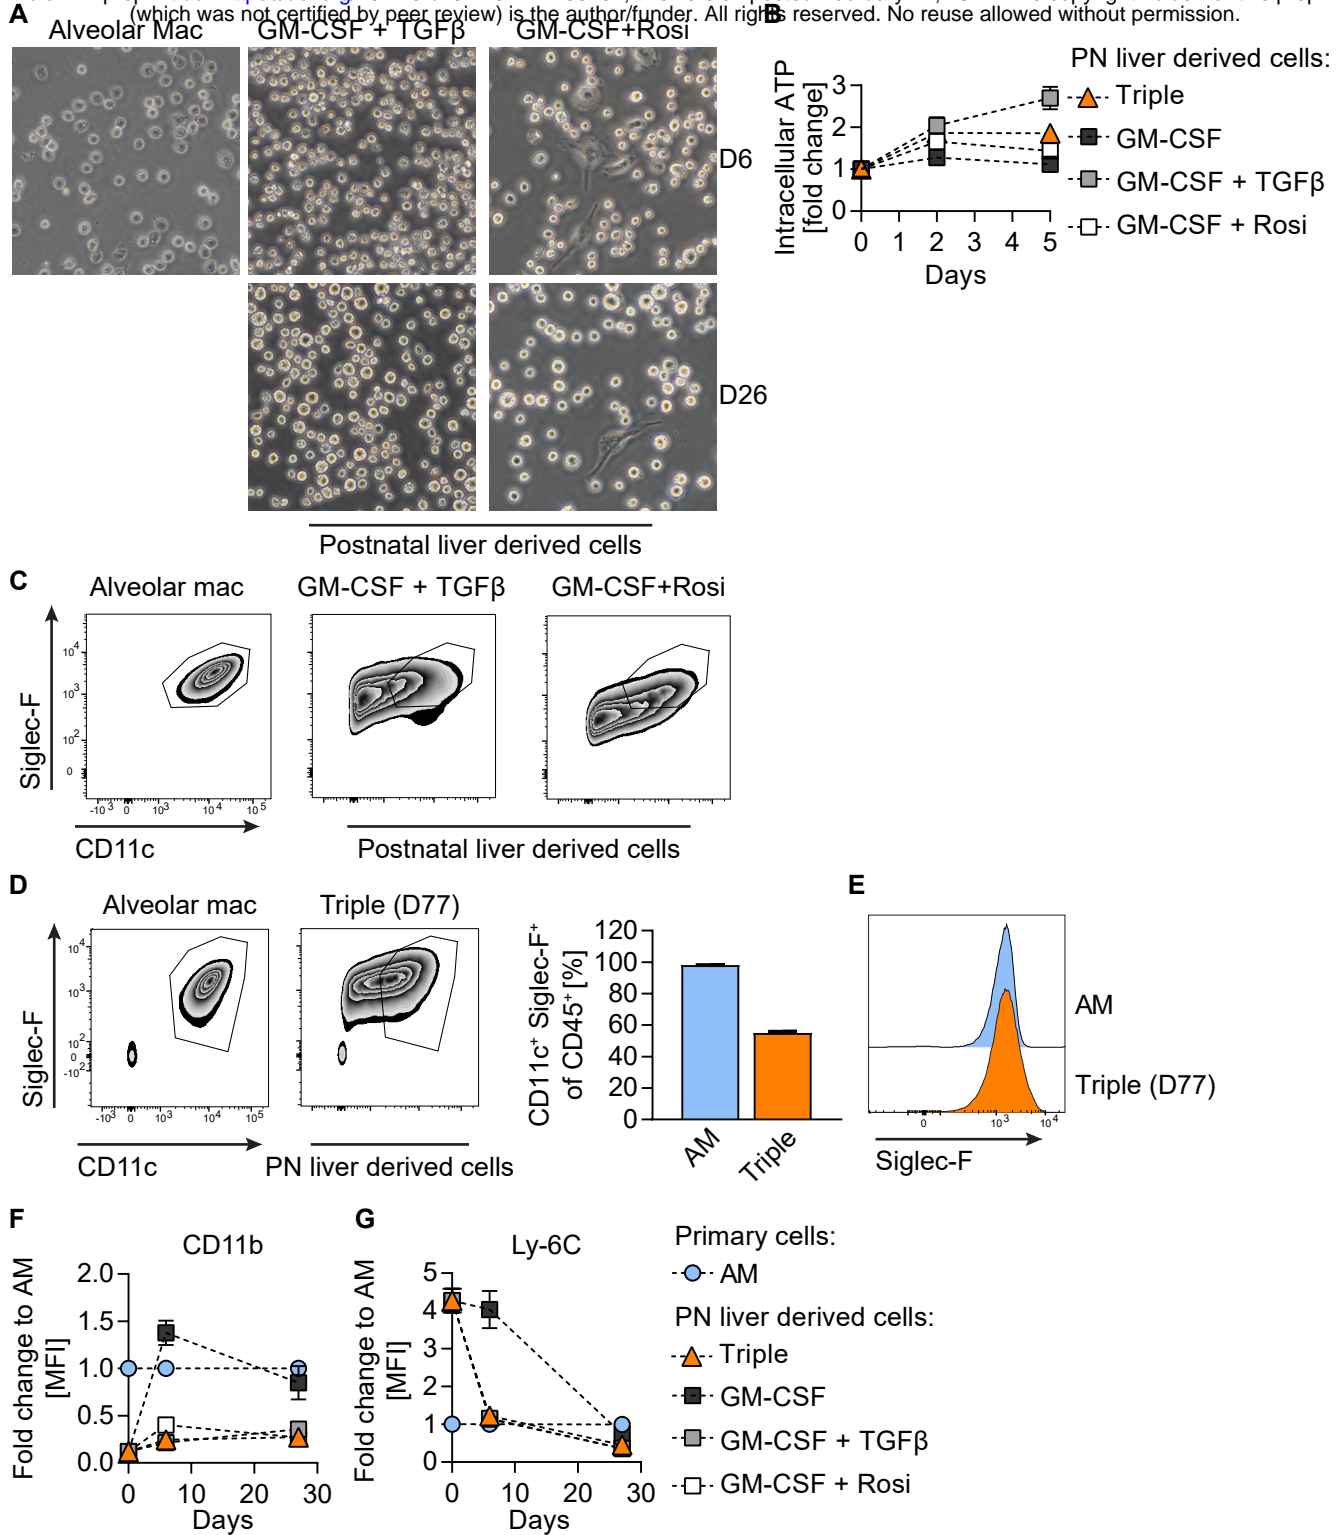

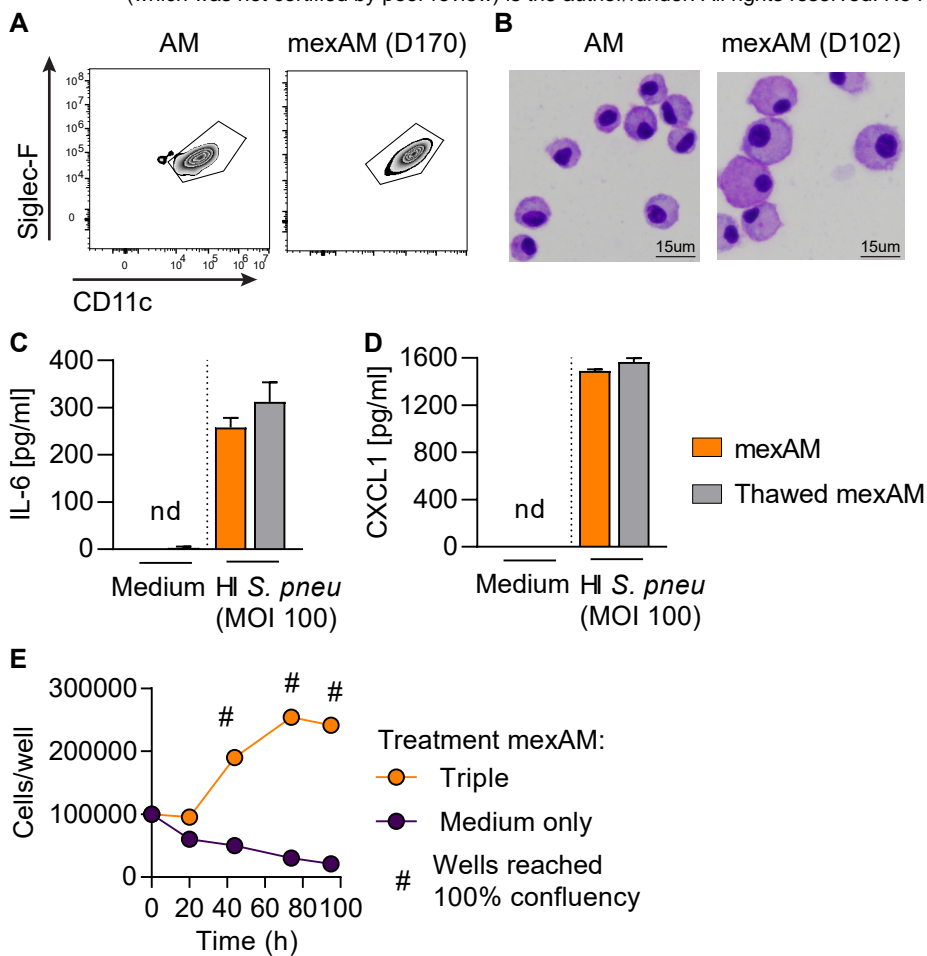

Figure S3

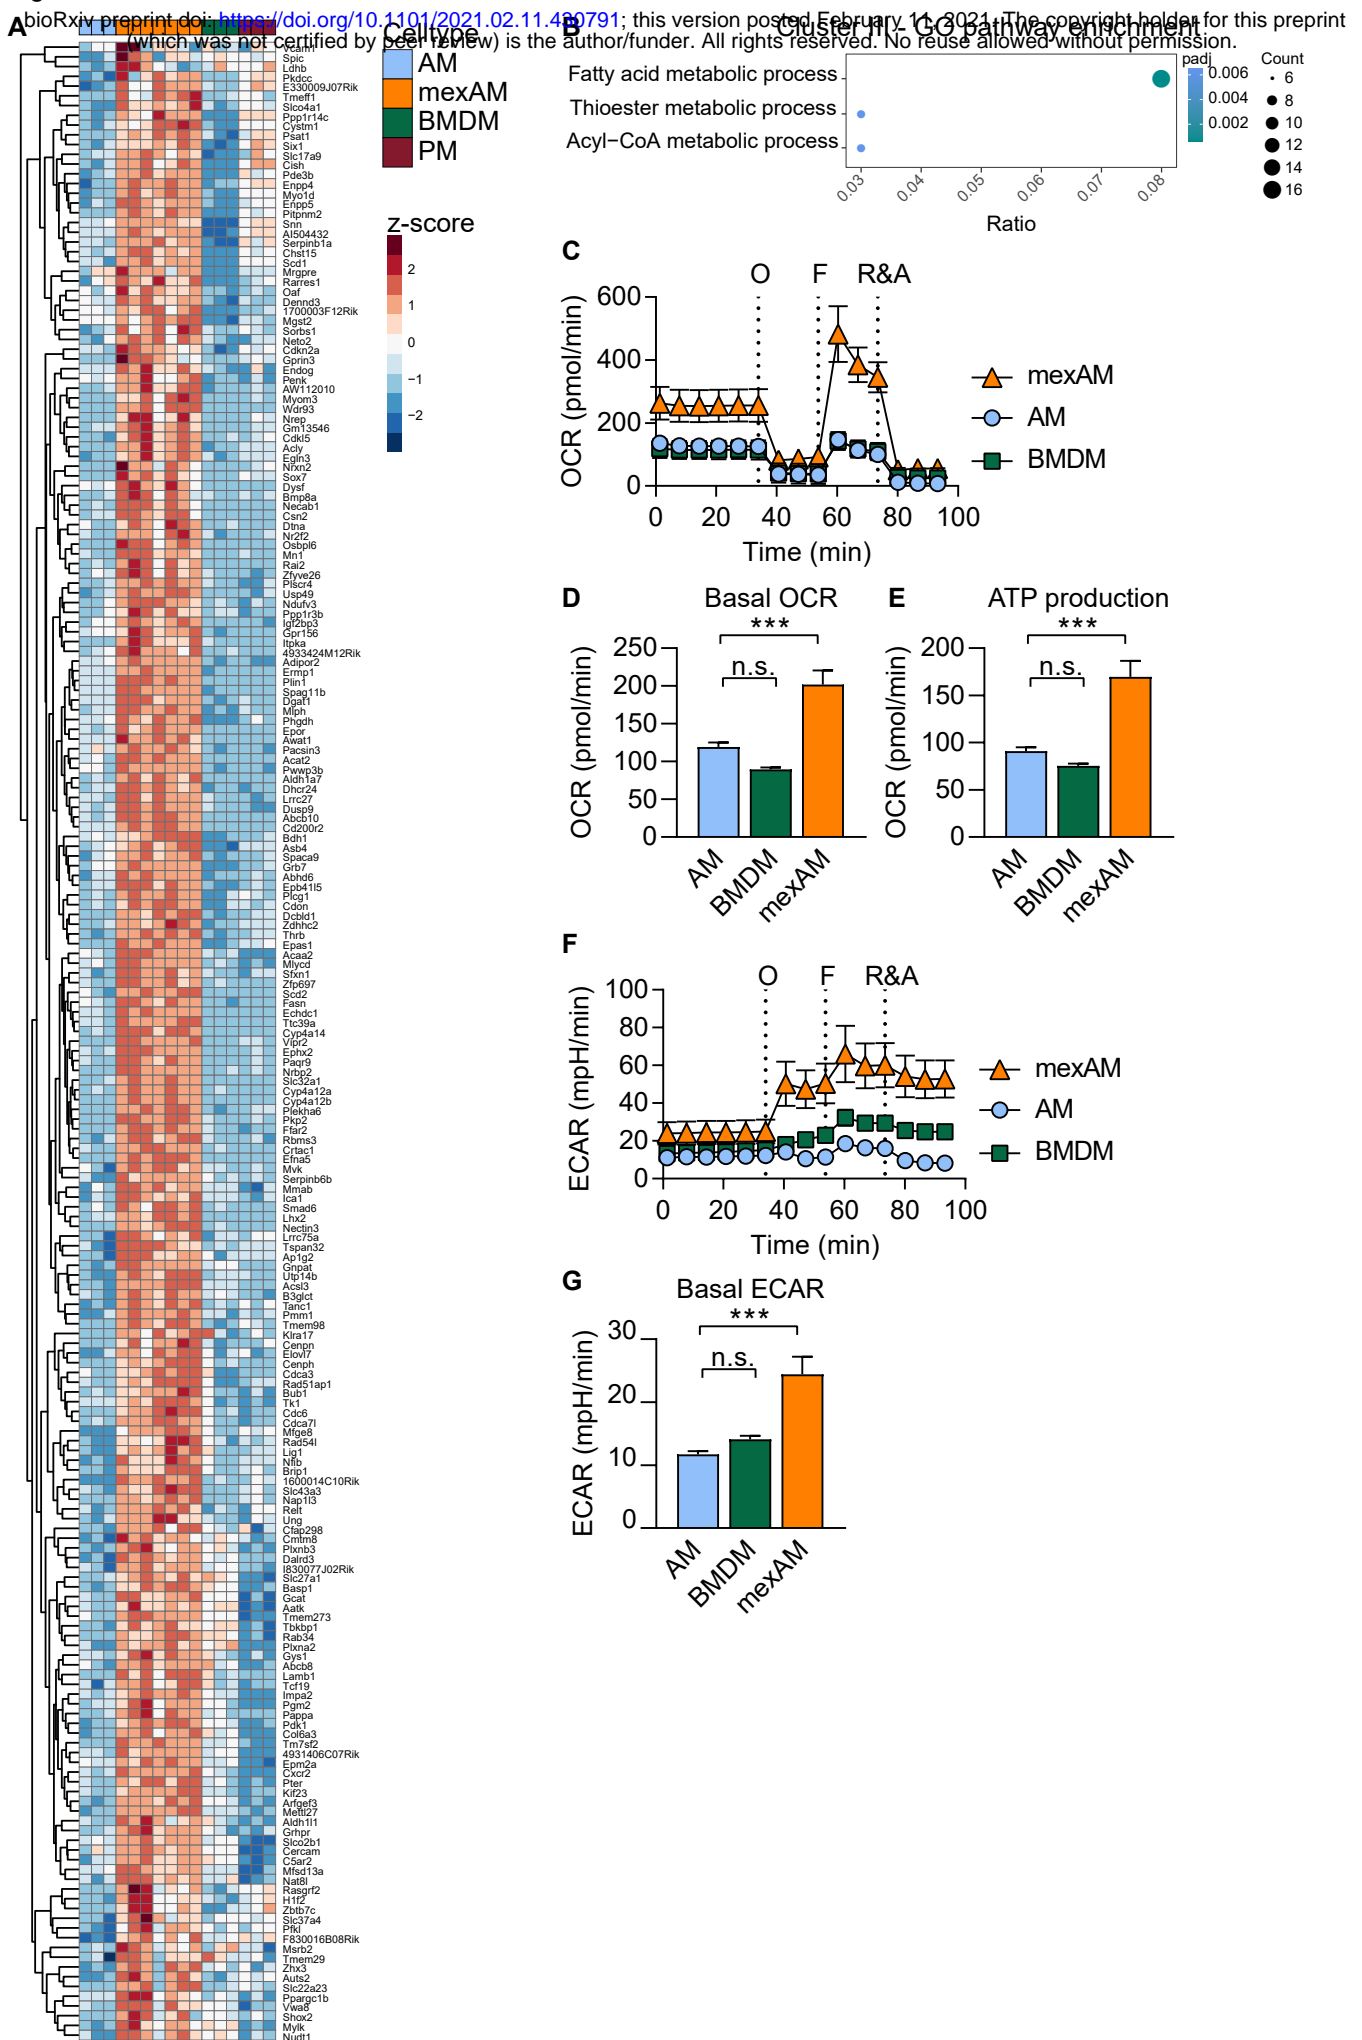

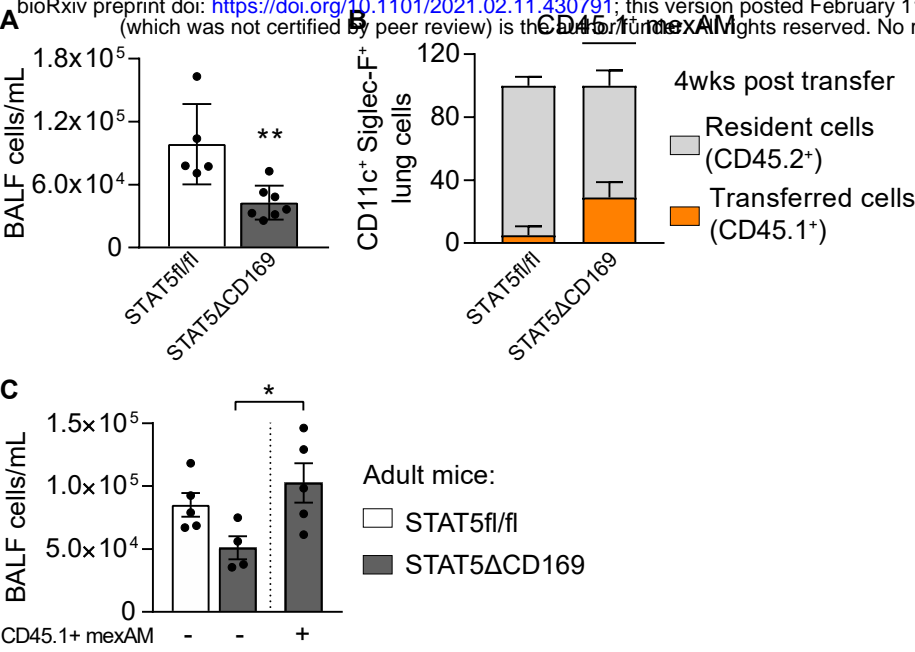

Figure S5

bioRxiv preprint doi: <https://doi.org/10.1101/2021.02.11.430791>; this version posted February 11, 2021. The copyright holder for this preprint (which was not certified by peer review) is the author/funder. All rights reserved. No reuse allowed without permission.

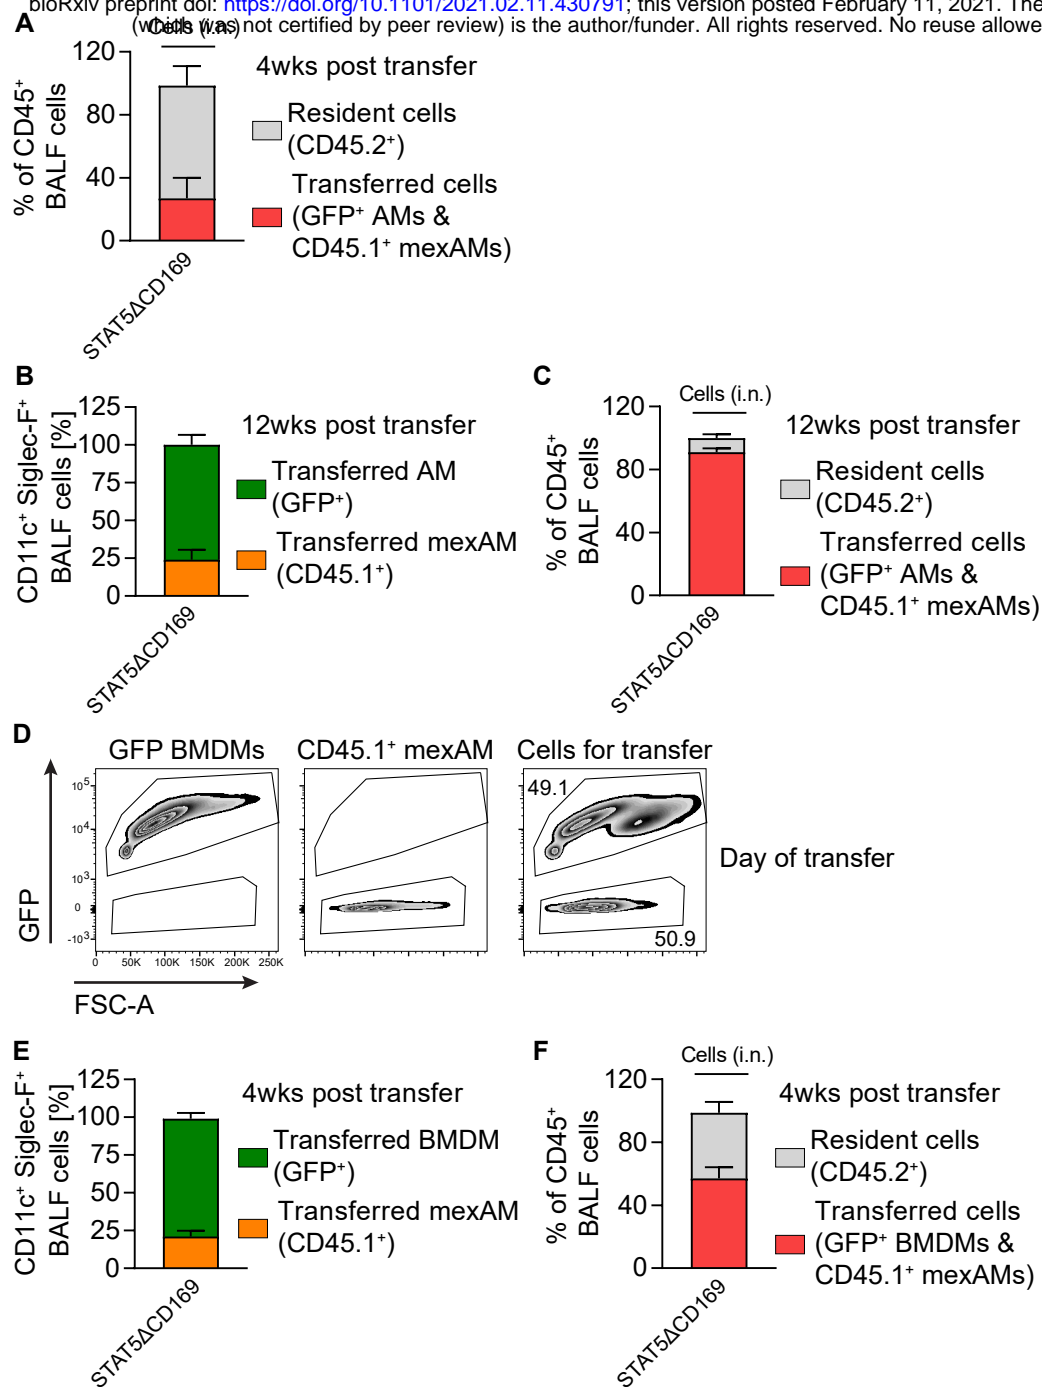

Source: http://biorxiv.org/content/10.1101/2021.02.11.430791v1.full.pdf
